# Supplementary material
Source: PubMed Central journal article supplement (PMC4887298)
Supplement: NIHMS772408-supplement-2.pdf [file NIHMS772408-supplement-2.pdf]

Supplementary Materials for

# **Monovar: single nucleotide variant detection in single cells**

Hamim Zafar<sup>1,2,3</sup>, Yong Wang<sup>3,4</sup>, Luay Nakhleh<sup>1</sup>, Nicholas Navin<sup>2,4,5</sup>, Ken Chen<sup>2,5</sup>

<sup>1</sup>Department of Computer Science, Rice University, Houston, TX, USA

<sup>2</sup>Department of Bioinformatics and Computational Biology, The University of Texas MD Anderson Cancer Center, Houston, TX, USA

<sup>3</sup>These authors contributed equally to this work,

<sup>4</sup>Department of Genetics, The University of Texas MD Anderson Cancer Center, Houston, TX, USA

<sup>5</sup>Corresponding authors: Ken Chen ([kchen3@mdanderson.org](mailto:kchen3@mdanderson.org)), Nicholas Navin ([nnavin@mdanderson.org](mailto:nnavin@mdanderson.org))

## Supplementary Notes on Results

### Performance Evaluation Using a Simulated Dataset

Three single cell sequencing datasets varying in the number of cells (10, 15 and 20 respectively) were simulated. A 1 Mbp region of chromosome 20 from human was chosen as the reference region for the simulated dataset (**Online Methods**). For each dataset, Monovar was compared against Samtools, GATK UnifiedGenotyper and GATK HaplotypeCaller. The algorithms were compared on the basis of two metrics, *detection efficiency* and precision. *Detection efficiency* (or recall) of an algorithm is defined as the percentage of true SNVs that it discovers from the single cells. Precision of an algorithm denotes the fraction of SNV calls that are true positives. Higher precision indicates lower number of false positives. While all the algorithms achieved similar detection efficiency, Monovar achieved higher precision compared to the other algorithms (**Supplementary Table 1**). Precision improvement of Monovar over GATK variants were ~22.6%, ~28.5% and ~31.9% for datasets with 10 cells, 15 cells and 20 cells respectively. Precision of each algorithm dropped as number of cells increased, owing to the higher possibility of calling false positives.

### Performance Evaluation in an Isogenic Cell Line

To validate Monovar and estimate its performance in comparison to other standard NGS variant callers, we analyzed data from an isogenic fibroblast cell line (SKN2). In these data, single cell exome sequencing was performed in addition to bulk exome sequencing using millions of cells (reference population). Because the single cells in SKN2 are isogenic, the consensus genotypes obtained from a reference population sample consisting of millions of cells can be used for validating genotypes identified in single cells<sup>8,16</sup>. To ensure the construction of a definitive reference set of variants, the reference population was sequenced at high coverage depth (59X) and breadth (99.76%)<sup>16</sup>. In this dataset, we can assume that the germline variants in a single cell are identical to the matched reference bulk population, and any additional mutations are considered FP errors, while missed mutations are either ADO or FN events. The exome sequencing data (mean coverage depth 65X and breadth 92.7%) for single cells were obtained using a method called single nucleus exome sequencing (SNES)<sup>16</sup>. Six single cells were gated from G1/0 stage of the cell cycle and six other single cells were gated from G2/M stage. In this previous work that used GATK as the SNV calling method, the allelic dropout rate was estimated to be 30.82% for G1/0 cells and 21.52% for G2/M cells. The FP error rate was 3.2e-5 for SNVs

and included predominantly (82.3%) deamination errors (C:G > T:A). The FP errors mostly occurred at random sites in the genomes of single cells<sup>16</sup>.

For this dataset, we compared Monovar to GATK (HaplotypeCaller) and Samtools. All algorithms were run to find multi-sample SNV call sets and those sets were compared on the basis of the aforementioned metrics. Data from 12 single cell samples and the reference population sample were pooled together and the algorithms were run on the pooled data. A union of the SNVs detected from the reference population sample using both Monovar and GATK constructed the gold standard variant set consisting of 51,154 SNVs. Out of these, 50,374 (98.5%) SNVs were called by both GATK and Monovar. The rationale for computing the union is to have a gold standard variant set that is unbiased towards any variant calling algorithm, ensuring a fair comparison.

These data show that Samtools performs poorly compared to GATK in terms of both metrics (**Supplementary Table 2**). Furthermore, Monovar achieves substantially higher precision (0.8376) compared to GATK (0.6641) and Samtools (0.5845) with a slight improvement in the detection efficiency. Such improvement is particularly evident, when inspecting the true-positive (TP) and the false-positive (FP) SNVs called jointly or uniquely by the 3 callers (**Fig. 1b-c**). A small percentage of SNVs detected by the algorithms (2.6% of total calls for Samtools, 2.2% of total calls for GATK and 4.9% of total calls for Monovar) are treated as neither TP nor FP because the reference population sample does not have sufficient coverage depth at those positions. Monovar also achieves the highest dbSNP precision, i.e., 83.02% of the SNVs detected by Monovar were found in dbSNP (v138), while for GATK it was 67.55% and for Samtools it was 60.71% (**Supplementary Table 3**). We also compared the spectrum of FP error variants, which showed that Monovar was able to broadly reduce many classes of FP transitions and transversions compared to that of GATK and Samtools (**Fig. 1d**). However, the most drastic reduction occurred in C:G > T:A transitions, which are the most prominent class of FP errors that arise during WGA<sup>16</sup>.

To assess the dependence of Monovar on the choice of threshold for classifying the genomic sites for the absence or presence of SNV, a precision-recall curve was drawn by varying the threshold used for calling SNV (**Fig. 1e**). Similar curves were drawn for GATK and Samtools by varying the minimum variant quality score used for calling SNV. These data show that Samtools achieves lower precision and detection efficiency compared to GATK and Monovar. Furthermore, Monovar achieves higher precision compared to GATK for the same detection efficiency.

To evaluate the effect of coverage depth on Monovar's variant calling performance, we down-sampled SKN2 data to various coverage depths (**Online Methods**). Monovar achieved consistently higher precision and detection efficiency as compared to GATK HaplotypeCaller for each down-sampled dataset (**Supplementary Figure 2**). Detection efficiency for each algorithm increases with higher coverage depth, whereas precision decreased. With higher coverage depth, more sites harboring false positive errors are represented in the datasets, resulting in the decrease in precision value. Higher coverage depth also results in more true SNVs being detected resulting in the rise in detection efficiency. The experiment shows that Monovar is able to detect most of the true mutations (~95%) at high precision (~93%) even for low coverage depth (10X).

To evaluate whether Monovar can detect true SNVs from subclones in heterogeneous mixed datasets, we performed a set of *in silico* mixing experiments. Subsets of normal SKN2 single cells were intermixed with subsets of tumor cells from Triple Negative Breast Cancer (TNBC) data<sup>8</sup> to mimic heterogeneous cell populations containing 0.076 to 0.5 proportions of SKN2 cells (**Online Methods**). For each subclone fraction, Monovar was evaluated in terms of precision and detection efficiency (**Supplementary Figure 3**). This experiment shows that even when only 1 SKN2 cell is present in the population (SKN2 subclone fraction 0.076), Monovar can detect >50% true mutations with very high precision (>95%). For a minor subclone (20% or 3/15 cells), Monovar was able to detect the majority (>85%) of true mutations at a high (~90%) precision and, as the SKN2 subclone frequency increases, detection efficiency of Monovar also increases.

### **Monovar Runtime**

Monovar was run on Intel processors with 2.50 GHz clock speed. When running on 2 CPU cores each with memory 8 GB, Monovar took about 7.5 hours to complete for the SKN2 dataset.

### **Supplementary Table 1 - Comparison of Variant Callers using Simulated Data.**

This table lists the comparison of different variant callers on three simulated datasets containing 10, 15 and 20 single cells, respectively. The results compare different metrics for multi-sample SNV calling. The columns are defined as: Number of true positives (TPs); Number of false positives (FPs); Precision [the ratio of TP and (TP + FP)]; the percentage of true SNVs called by the algorithm (Detection Efficiency).

### **Supplementary Table 2 - Comparison of Multi-sample SNV Calls in the Normal Cell Line**

This table lists the comparison of different variant calling algorithms for the isogenic cell line. All methods were run on data pooled from 12 single cell samples and the population sample. The results compare the different metrics for multi-sample SNV calling. The columns are defined as: Number of SNVs called by the algorithm; Number of true positives (TPs); the SNVs that are detected from both single cell and population samples; Number of false positives (FPs); SNVs detected from the single cell samples but are not detected in the reference population sample; Number of false negatives (FNs), the SNVs that are not detected from the single cell samples but are detected from the reference population sample; Precision [the ratio of TP and (TP + FP)]; the percentage of true SNVs called by the algorithm (Detection Efficiency).

### **Supplementary Table 3 - Overlap of SNV Callset with dbSNP for the Normal Cell Line**

This table lists the results of comparison of the algorithms for the isogenic cell line with respect to dbSNP (v138). The columns are defined as: Number of SNVs called by the algorithm (N); Number of true positives (TP), SNVs that are present in the dbSNP database; Number of false positives (FP), the SNVs not found in the dbSNP database; dbSNP Precision, the ratio of TP and total number of called SNVs (N).

### **Supplementary Table 4 – Somatic Mutations Detected in Tumor Samples**

This table lists all somatic mutations detected in the TNBC sample (ST4.1), the bladder cancer sample (ST4.2) and the ALL cancer sample (ST4.3). The columns are defined as: classification (subclonal or clonal classification); chromosome (human chromosome with mutation); coordinate (start coordinate of the mutations); ref (reference variant); var (mutation variant); dbSNP (overlap with a known SNP in the dbSNP database); cosmic (overlap with a known COSMIC database mutation); cancer gene (intersection with a cancer gene from the cancer census database); POLY (polyphen score); SIFT (sift score); Gene ID (Genbank Identifier); Exon (exon number); nucleotide (nucleotide position of the mutation); Amino Acid (amino acid substitution caused by

the mutation). Rows highlighted in blue are mutations with significant polyphen and sift scores that are annotated in the heatmap Figure 2. Red rows are significant, but are not annotated on the heatmap.

#### **Supplementary Table 5 – New Mutations Identified by Monovar**

This table lists new somatic mutations detected in the TNBC sample (ST5.1), the bladder cancer sample (ST5.2) and the ALL cancer sample (ST5.3) that were not previously identified in the original studies. The columns are defined as: classification (subclonal or clonal classification); chromosome (human chromosome with mutation); coordinate (start coordinate of the mutations); ref (reference variant); var (mutation variant); dbSNP (overlap with a known SNP in the dbSNP database); cosmic (overlap with a known COSMIC database mutation); cancer gene (intersection with a cancer gene from the cancer census database); POLY (polyphen score); SIFT (sift score); Gene ID (Genbank Identifier); Exon (exon number); nucleotide (nucleotide position of the mutation); Amino Acid (amino acid substitution caused by the mutation). Rows highlighted in blue are mutations with significant polyphen and sift scores that are annotated in the heatmap in Figure 2.

#### **Supplementary Table 6 - Prior probabilities for $p_{\beta}^{g^{[1]}g^{[2]}}$ for 10 genotypes**

The rows represent ten possible diploid genotypes ( $g^{[1]}g^{[2]}$ ). For each genotype, four conditional probabilities ( $p_{\beta}^{g^{[1]}g^{[2]}}$ ) are considered corresponding to four possible values of  $\beta$ .

Supplementary Table 1: Comparison of Variant Callers using Simulated Data

Dataset 1, Number of Single Cells = 10

| Method                | Number of True Positives (TP) | Number of False Positives (FP) | Precision (TP/TP+FP) | Detection Efficiency /Recall |
|-----------------------|-------------------------------|--------------------------------|----------------------|------------------------------|
| Samtools              | 976                           | 298                            | 0.766                | 0.976                        |
| GATK UnifiedGenotyper | 976                           | 277                            | 0.778                | 0.976                        |
| GATK HaplotypeCaller  | 976                           | 281                            | 0.776                | 0.976                        |
| Monovar               | 976                           | 47                             | 0.954                | 0.976                        |

Dataset 2, Number of Single Cells = 15

| Method                | Number of True Positives (TP) | Number of False Positives (FP) | Precision (TP/TP+FP) | Detection Efficiency /Recall |
|-----------------------|-------------------------------|--------------------------------|----------------------|------------------------------|
| Samtools              | 970                           | 440                            | 0.687                | 0.970                        |
| GATK UnifiedGenotyper | 970                           | 400                            | 0.708                | 0.970                        |
| GATK HaplotypeCaller  | 970                           | 402                            | 0.706                | 0.970                        |
| Monovar               | 970                           | 96                             | 0.910                | 0.970                        |

Dataset 3, Number of Single Cells = 20

| Method                | Number of True Positives (TP) | Number of False Positives (FP) | Precision (TP/TP+FP) | Detection Efficiency /Recall |
|-----------------------|-------------------------------|--------------------------------|----------------------|------------------------------|
| Samtools              | 962                           | 578                            | 0.625                | 0.962                        |
| GATK UnifiedGenotyper | 963                           | 503                            | 0.657                | 0.963                        |
| GATK HaplotypeCaller  | 963                           | 505                            | 0.656                | 0.963                        |
| Monovar               | 963                           | 149                            | 0.866                | 0.963                        |



Supplementary Table 2 - Comparison of Multi-sample SNV Calls in the Normal Cell Line

| Method   | Number of SNVs Called (N) | Number of True Positives (TP) | Number of False Positives (FP) | Number of False Negatives (FN) | Precision (TP/TP+FP) | Detection Efficiency /Recall |
|----------|---------------------------|-------------------------------|--------------------------------|--------------------------------|----------------------|------------------------------|
| Samtools | 83790                     | 47663                         | 33877                          | 3491                           | 0.5845               | 93.17                        |
| GATK     | 75173                     | 48781                         | 24665                          | 2373                           | 0.6641               | 95.36                        |
| Monovar  | 62929                     | 50114                         | 9715                           | 1040                           | 0.8376               | 97.96                        |

Supplementary Table 3: Overlap of the SNV Callset with dbSNP for the Normal Cell Line

| Method   | Number of SNVs Called (N) | Number of True Positives (TP) | Number of False Positives (FP) | dbSNP Precision (TP/N) |
|----------|---------------------------|-------------------------------|--------------------------------|------------------------|
| Samtools | 83790                     | 50877                         | 32913                          | 0.6071                 |
| GATK     | 75173                     | 50785                         | 24388                          | 0.6755                 |
| Monovar  | 62929                     | 52248                         | 10681                          | 0.8302                 |

Supplementary Table ST4.1 Somatic Mutations Detected in TNBC

| Classification | Chromos | Coordinat | Ref | Var | Gene Name | dbSNP | Cosmic | CancerGene | POLY     | SIFT | Types             | Gene ID      | Exon   | Nucleotide | Amino Acid |
|----------------|---------|-----------|-----|-----|-----------|-------|--------|------------|----------|------|-------------------|--------------|--------|------------|------------|
| Clonal         | chr10   | 89682884  | C   | T   | PTEN      | .     | p.?    | PTEN       | 0.735283 | 0    | stopgain SNV      | NM_000314    | exon5  | c.C388T    | p.R130X    |
| Clonal         | chr4    | 77447102  | C   | T   | STBD1     | .     | NA     | NA         | NA       | NA   | synonymous SNV    | NM_003943    | exon1  | c.C156T    | p.G52G     |
| Clonal         | chr19   | 57018973  | C   | T   | FPR3      | .     | NA     | NA         | 0.999    | 0    | nonsynonymous SNV | NM_002030    | exon2  | c.C160T    | p.R54W     |
| Clonal         | chr16   | 30701629  | C   | T   | ZNF629    | .     | NA     | NA         | NA       | NA   | synonymous SNV    | NM_001080417 | exon3  | c.G1521A   | p.T507T    |
| Clonal         | chr6    | 34134825  | A   | C   | GRM4      | .     | NA     | NA         | 0.967    | 0    | nonsynonymous SNV | NM_001256811 | exon5  | c.T931G    | p.S311A    |
| Clonal         | chr18   | 31087599  | C   | G   | ZSCAN30   | .     | NA     | NA         | 0.982    | 0    | nonsynonymous SNV | NM_001112734 | exon4  | c.G1298C   | p.R433T    |
| Clonal         | chr19   | 45232719  | A   | G   | ZNF780B   | .     | NA     | NA         | NA       | NA   | synonymous SNV    | NM_001005851 | exon5  | c.T1887C   | p.N629N    |
| Clonal         | chrX    | 106970866 | C   | T   | MID2      | .     | NA     | NA         | NA       | NA   | synonymous SNV    | NM_012216    | exon2  | c.C315T    | p.R105R    |
| Clonal         | chr14   | 72229640  | G   | C   | DPF3      | .     | NA     | NA         | NA       | NA   | synonymous SNV    | NM_012074    | exon7  | c.C639G    | p.L213L    |
| Clonal         | chr11   | 4630409   | C   | A   | OR51E1    | .     | NA     | NA         | 0.006    | 0.21 | nonsynonymous SNV | NM_152430    | exon2  | c.C77A     | p.A26D     |
| Clonal         | chr1    | 120261858 | G   | C   | NOTCH2    | .     | NA     | NA         | 0.003    | 1    | nonsynonymous SNV | NM_024408    | exon33 | c.C5980G   | p.L1994V   |
| Clonal         | chr4    | 56875862  | C   | T   | KIAA1211  | .     | NA     | NA         | NA       | NA   | synonymous SNV    | NM_020722    | exon8  | c.C1437T   | p.P479P    |
| Clonal         | chr2    | 234191331 | C   | T   | UGT1A8    | .     | NA     | NA         | 0.465889 | 0.04 | nonsynonymous SNV | NM_019076    | exon1  | c.C239T    | p.S80L     |
| Clonal         | chr18   | 16849409  | A   | G   | ROCK1     | .     | NA     | NA         | 0.093    | 0.87 | nonsynonymous SNV | NM_005406    | exon13 | c.T1391C   | p.M464T    |
| Clonal         | chr1    | 16598475  | C   | G   | SPATA21   | .     | NA     | NA         | 0.125    | 0    | nonsynonymous SNV | NM_198546    | exon12 | c.G1303C   | p.D435H    |
| Clonal         | chr6    | 43275813  | G   | C   | CUL9      | .     | NA     | NA         | 0.334    | 0    | nonsynonymous SNV | NM_015089    | exon14 | c.G3325C   | p.E1109Q   |
| Clonal         | chr1    | 152464249 | G   | A   | UBAP2L    | .     | NA     | NA         | 0.706009 | 0.05 | nonsynonymous SNV | NM_014847    | exon2  | c.G26A     | p.R9Q      |
| Clonal         | chr19   | 47723143  | G   | A   | CEACAM1   | .     | NA     | NA         | 0.001    | 0    | nonsynonymous SNV | NM_001712    | exon2  | c.C314T    | p.A105V    |
| Clonal         | chr6    | 132037967 | G   | T   | ENPP3     | .     | NA     | NA         | 0.7355   | 0    | stopgain SNV      | NM_005021    | exon9  | c.G817T    | p.G273X    |
| Clonal         | chr11   | 6369679   | G   | A   | SMPD1     | .     | NA     | NA         | 0.325    | 0.44 | nonsynonymous SNV | NM_001007593 | exon2  | c.G805A    | p.G269S    |
| Clonal         | chr3    | 184728396 | C   | T   | KLHL6     | .     | NA     | NA         | NA       | NA   | synonymous SNV    | NM_130446    | exon2  | c.G390A    | p.T130T    |
| Clonal         | chr16   | 70727901  | C   | A   | PMFBP1    | .     | NA     | NA         | 0.733742 | 0.19 | stopgain SNV      | NM_001160213 | exon10 | c.G715T    | p.E239X    |
| Clonal         | chr13   | 50753147  | G   | A   | FAM124A   | .     | NA     | NA         | NA       | NA   | synonymous SNV    | NM_001242312 | exon4  | c.G1395A   | p.L465L    |
| Clonal         | chr19   | 48915628  | G   | A   | IRGC      | .     | NA     | NA         | 0.475    | 0.57 | nonsynonymous SNV | NM_019612    | exon2  | c.G1078A   | p.A360T    |
| Clonal         | chr20   | 44071925  | G   | A   | MMP9      | .     | NA     | NA         | 0.999    | 0.01 | nonsynonymous SNV | NM_004994    | exon2  | c.G152A    | p.R51H     |
| Clonal         | chr3    | 102445981 | C   | T   | IMPG2     | .     | NA     | NA         | NA       | NA   | synonymous SNV    | NM_016247    | exon13 | c.G1884A   | p.L628L    |
| Clonal         | chr6    | 43221105  | G   | A   | PTK7      | .     | NA     | NA         | 0.993    | 0    | nonsynonymous SNV | NM_152880    | exon15 | c.G2477A   | p.R826Q    |
| Clonal         | chr6    | 26025038  | G   | A   | SLC17A2   | .     | NA     | NA         | 0.732755 | 0.54 | stopgain SNV      | NM_005835    | exon8  | c.C784T    | p.R262X    |
| Clonal         | chr1    | 111018302 | C   | T   | KCNA3     | .     | NA     | NA         | 0.999    | 0    | nonsynonymous SNV | NM_002232    | exon1  | c.G653A    | p.R218H    |
| Clonal         | chr2    | 73320350  | C   | G   | CCT7      | .     | NA     | NA         | NA       | 0    | nonsynonymous SNV | NM_006429    | exon2  | c.C78G     | p.I26M     |
| Clonal         | chr7    | 47843113  | G   | A   | PKD1L1    | .     | NA     | NA         | NA       | NA   | synonymous SNV    | NM_138295    | exon37 | c.C5874T   | p.T1958T   |
| Clonal         | chr1    | 65117387  | G   | T   | JAK1      | .     | NA     | NA         | 0.98     | 0    | nonsynonymous SNV | NM_002227    | exon4  | c.C238A    | p.L80M     |
| Clonal         | chr12   | 2800705   | C   | T   | ITFG2     | .     | NA     | NA         | 0.731979 | 0.03 | stopgain SNV      | NM_018463    | exon7  | c.C712T    | p.R238X    |
| Clonal         | chr3    | 150951196 | G   | T   | COMMD2    | .     | NA     | NA         | 0.27     | 0.26 | nonsynonymous SNV | NM_016094    | exon4  | c.C361A    | p.L121I    |
| Clonal         | chr3    | 64557585  | G   | A   | ADAMTS9   | .     | NA     | NA         | NA       | NA   | synonymous SNV    | NM_182920    | exon27 | c.C4140T   | p.S1380S   |
| Clonal         | chr15   | 43227468  | G   | A   | DUOX1     | .     | NA     | NA         | 0.998    | 0    | nonsynonymous SNV | NM_017434    | exon21 | c.G2623A   | p.E875K    |
| Clonal         | chr5    | 140037163 | C   | G   | HARS      | .     | NA     | NA         | 0.978    | 0    | nonsynonymous SNV | NM_002109    | exon8  | c.G756C    | p.E252D    |
| Clonal         | chrX    | 123484999 | C   | T   | TENM1     | .     | NA     | NA         | 0.961    | 0.09 | nonsynonymous SNV | NM_014253    | exon17 | c.G2929A   | p.D977N    |
| Clonal         | chr19   | 44658851  | G   | A   | SUPT5H    | .     | NA     | NA         | 0.003    | 0.38 | nonsynonymous SNV | NM_003169    | exon29 | c.G3236A   | p.R1079H   |
| Clonal         | chr14   | 75975794  | C   | T   | ESRRB     | .     | NA     | NA         | NA       | NA   | synonymous SNV    | NM_004452    | exon4  | c.C345T    | p.Y115Y    |
| Clonal         | chr19   | 14368264  | G   | C   | CD97      | .     | NA     | NA         | 0.389    | 0.45 | nonsynonymous SNV | NM_001025160 | exon5  | c.G457C    | p.E153Q    |
| Clonal         | chr6    | 42998906  | C   | A   | PTCRA     | .     | NA     | NA         | 0.792    | 0    | nonsynonymous SNV | NM_001243169 | exon3  | c.C147A    | p.F49L     |
| Clonal         | chr11   | 66835862  | C   | A   | SSH3      | .     | NA     | NA         | NA       | NA   | synonymous SNV    | NM_017857    | exon14 | c.C1908A   | p.S636S    |
| Clonal         | chr5    | 178961579 | C   | T   | RUFY1     | .     | NA     | NA         | NA       | NA   | synonymous SNV    | NM_025158    | exon15 | c.C1842T   | p.G614G    |
| Clonal         | chr11   | 60805108  | G   | A   | VWCE      | .     | NA     | NA         | NA       | NA   | synonymous SNV    | NM_152718    | exon8  | c.C963T    | p.P321P    |
| Clonal         | chrX    | 53241916  | C   | A   | KDM5C     | .     | NA     | NA         | NA       | NA   | synonymous SNV    | NM_004187    | exon20 | c.G3027T   | p.A1009A   |
| Clonal         | chr20   | 51632206  | C   | T   | ZNF217    | .     | NA     | NA         | NA       | NA   | synonymous SNV    | NM_006526    | exon1  | c.G567A    | p.Q189Q    |
| Clonal         | chr7    | 55527565  | C   | T   | VOPP1     | .     | NA     | NA         | NA       | NA   | nonsynonymous SNV | NM_030796    | exon4  | c.G232A    | p.G78S     |
| Clonal         | chr1    | 94281482  | G   | T   | ABCA4     | .     | NA     | NA         | 0.735507 | 0    | stopgain SNV      | NM_000350    | exon21 | c.C3188A   | p.S1063X   |
| Clonal         | chrX    | 5821019   | G   | T   | NLGN4X    | .     | NA     | NA         | 0        | 0.22 | nonsynonymous SNV | NM_020742    | exon6  | c.C2290A   | p.L764M    |
| Clonal         | chr6    | 36036645  | G   | C   | SLC26A8   | .     | NA     | NA         | 0.995    | 0.01 | nonsynonymous SNV | NM_052961    | exon14 | c.C1591G   | p.Q531E    |
| Clonal         | chr19   | 16200705  | A   | C   | AP1M1     | .     | NA     | NA         | 0        | 0.07 | nonsynonymous SNV | NM_001130524 | exon10 | c.A1049C   | p.N350T    |

|        |       |           |   |   |          |   |    |    |          |      |                   |              |        |          |          |
|--------|-------|-----------|---|---|----------|---|----|----|----------|------|-------------------|--------------|--------|----------|----------|
| Clonal | chr6  | 36821201  | G | A | CPNE5    | . | NA | NA | 0.964    | 0    | nonsynonymous SNV | NM_020939    | exon17 | c.C1270T | p.R424C  |
| Clonal | chr19 | 17953670  | C | T | KCNN1    | . | NA | NA | NA       | NA   | synonymous SNV    | NM_002248    | exon5  | c.C651T  | p.Y217Y  |
| Clonal | chr7  | 100011846 | C | T | LRCH4    | . | NA | NA | 0.178    | 0.29 | nonsynonymous SNV | NM_002319    | exon15 | c.G1589A | p.R530Q  |
| Clonal | chrX  | 152873794 | C | T | HCFC1    | . | NA | NA | 0.956    | 0.09 | nonsynonymous SNV | NM_005334    | exon17 | c.G3250A | p.E1084K |
| Clonal | chr19 | 19169055  | G | A | RFXANK   | . | NA | NA | 0.002    | 0.28 | nonsynonymous SNV | NM_003721    | exon5  | c.G332A  | p.R111Q  |
| Clonal | chr5  | 140187946 | G | A | PCDH46   | . | NA | NA | 0.559211 | 0    | nonsynonymous SNV | NM_018909    | exon1  | c.G86A   | p.G29D   |
| Clonal | chr8  | 121306627 | T | C | COL14A1  | . | NA | NA | NA       | NA   | synonymous SNV    | NM_021110    | exon15 | c.T1857C | p.F619F  |
| Clonal | chr19 | 45012991  | G | A | DYRK1B   | . | NA | NA | 0.09     | 0.07 | nonsynonymous SNV | NM_006483    | exon4  | c.C236T  | p.S79L   |
| Clonal | chr20 | 533252    | G | A | TCF15    | . | NA | NA | 0.698278 | 0.02 | stopgain SNV      | NM_004609    | exon2  | c.C583T  | p.R195X  |
| Clonal | chr17 | 45958316  | G | T | MYCBPAP  | . | NA | NA | 0.457141 | 0.47 | stopgain SNV      | NM_032133    | exon14 | c.G1987T | p.E663X  |
| Clonal | chr19 | 12896481  | G | A | FARSA    | . | NA | NA | NA       | NA   | synonymous SNV    | NM_004461    | exon10 | c.C1167T | p.G389G  |
| Clonal | chr19 | 15146135  | C | T | NOTCH3   | . | NA | NA | 0.993    | 0.5  | nonsynonymous SNV | NM_000435    | exon25 | c.G4480A | p.G1494S |
| Clonal | chr19 | 60848088  | G | T | ZNF581   | . | NA | NA | 0.968    | 0.01 | nonsynonymous SNV | NM_016535    | exon2  | c.G339T  | p.K113N  |
| Clonal | chr1  | 153490533 | G | A | FAM189B  | . | NA | NA | 0.958    | 0.08 | nonsynonymous SNV | NM_001267608 | exon2  | c.C302T  | p.A101V  |
| Clonal | chr1  | 16598446  | C | A | SPATA21  | . | NA | NA | 0.018    | 0    | nonsynonymous SNV | NM_198546    | exon12 | c.G1332T | p.Q444H  |
| Clonal | chr17 | 58156148  | G | C | MARCH10  | . | NA | NA | 0.993    | 0.01 | nonsynonymous SNV | NM_001100875 | exon7  | c.C1987G | p.Q663E  |
| Clonal | chr1  | 179170880 | C | T | KIAA1614 | . | NA | NA | NA       | NA   | synonymous SNV    | NM_020950    | exon5  | c.C1212T | p.G404G  |
| Clonal | chr1  | 200570774 | C | A | UBE2T    | . | NA | NA | 0.999    | 0    | nonsynonymous SNV | NM_014176    | exon3  | c.C145T  | p.G49C   |
| Clonal | chr16 | 9770251   | G | A | GRIN2A   | . | NA | NA | NA       | NA   | synonymous SNV    | NM_001134408 | exon12 | c.C2553T | p.G851G  |
| Clonal | chr17 | 69836175  | G | A | KIF19    | . | NA | NA | NA       | 0    | nonsynonymous SNV | NM_153209    | exon2  | c.G56A   | p.R19Q   |
| Clonal | chr1  | 16075303  | C | T | SPEN     | . | NA | NA | 0.999    | 0    | nonsynonymous SNV | NM_015001    | exon3  | c.C424T  | p.R142C  |
| Clonal | chr20 | 33485174  | C | T | GDF5     | . | NA | NA | 0.964    | 0    | nonsynonymous SNV | NM_000557    | exon2  | c.G1453A | p.V485M  |
| Clonal | chr17 | 39991905  | C | G | FZD2     | . | NA | NA | 0.972    | 0    | nonsynonymous SNV | NM_001466    | exon1  | c.C1323G | p.I441M  |
| Clonal | chr16 | 54080129  | G | A | MMP2     | . | NA | NA | 0.932    | 0.25 | nonsynonymous SNV | NM_004530    | exon6  | c.G1006A | p.A336T  |
| Clonal | chr17 | 39992097  | G | A | FZD2     | . | NA | NA | NA       | NA   | synonymous SNV    | NM_001466    | exon1  | c.G1515A | p.P505P  |
| Clonal | chr17 | 39831558  | G | C | GPATCH8  | . | NA | NA | 0.96     | 0    | nonsynonymous SNV | NM_001002909 | exon8  | c.C3413G | p.S1138C |
| Clonal | chr3  | 47687162  | A | G | SMARCC1  | . | NA | NA | 0.979    | 0    | nonsynonymous SNV | NM_003074    | exon19 | c.T1889C | p.L630P  |
| Clonal | chr3  | 49026456  | G | A | WDR6     | . | NA | NA | 0        | 0.15 | nonsynonymous SNV | NM_018031    | exon2  | c.G2575A | p.A859T  |
| Clonal | chr22 | 40425560  | C | G | MEI1     | . | NA | NA | NA       | 0    | nonsynonymous SNV | NM_152513    | exon1  | c.C72G   | p.F24L   |
| Clonal | chr8  | 2034136   | G | A | MYOM2    | . | NA | NA | 0.308    | 0.22 | nonsynonymous SNV | NM_003970    | exon19 | c.G2356A | p.A786T  |
| Clonal | chr2  | 86535747  | C | T | KDM3A    | . | NA | NA | 0        | 0.04 | nonsynonymous SNV | NM_001146688 | exon5  | c.C482T  | p.T161M  |
| Clonal | chr10 | 100140401 | G | A | PYROXD2  | . | NA | NA | NA       | NA   | synonymous SNV    | NM_032709    | exon12 | c.C1236T | p.D412D  |
| Clonal | chr4  | 13210648  | C | A | BOD1L1   | . | NA | NA | 0.995    | 0    | nonsynonymous SNV | NM_148894    | exon10 | c.G6974T | p.S2325I |
| Clonal | chr1  | 47277018  | C | T | CYP4X1   | . | NA | NA | 0.986    | 0.72 | nonsynonymous SNV | NM_178033    | exon7  | c.C875T  | p.S292F  |
| Clonal | chr17 | 64733081  | G | A | ABCA10   | . | NA | NA | 0.303    | 0.02 | nonsynonymous SNV | NM_080282    | exon4  | c.C14T   | p.A5V    |
| Clonal | chr18 | 40535737  | G | A | SETBP1   | . | NA | NA | 0.977    | 0.03 | nonsynonymous SNV | NM_015559    | exon2  | c.G428A  | p.R143H  |
| Clonal | chr2  | 1656476   | C | T | PXDN     | . | NA | NA | NA       | NA   | nonsynonymous SNV | NM_012293    | exon9  | c.G964A  | p.V322M  |
| Clonal | chr8  | 2041541   | C | A | MYOM2    | . | NA | NA | 0.442    | 0.06 | nonsynonymous SNV | NM_003970    | exon22 | c.C2837A | p.S946Y  |
| Clonal | chr20 | 18474646  | G | T | SEC23B   | . | NA | NA | 0.547    | 0    | nonsynonymous SNV | NM_032986    | exon15 | c.G1712T | p.R571M  |
| Clonal | chr2  | 31659258  | G | T | UNKNOWN  | . | NA | NA | NA       | 0.19 | unknown           |              |        |          |          |
| Clonal | chr16 | 56633668  | C | T | MMP15    | . | NA | NA | NA       | NA   | synonymous SNV    | NM_002428    | exon7  | c.C1197T | p.R399R  |
| Clonal | chr6  | 15641462  | C | T | DTNBP1   | . | NA | NA | 0        | 0.56 | nonsynonymous SNV | NM_032122    | exon8  | c.G655A  | p.A219T  |
| Clonal | chr20 | 25441537  | G | A | NINL     | . | NA | NA | 0.793    | 0.28 | nonsynonymous SNV | NM_025176    | exon4  | c.C383T  | p.P128L  |
| Clonal | chr7  | 6527600   | C | T | GRID2IP  | . | NA | NA | NA       | NA   | nonsynonymous SNV | NM_001145118 | exon6  | c.G1069A | p.V357I  |
| Clonal | chr5  | 137654301 | G | C | CDC25C   | . | NA | NA | 0.858    | 0.03 | nonsynonymous SNV | NM_001790    | exon9  | c.C790G  | p.L264V  |
| Clonal | chr11 | 93443313  | G | T | HEPHL1   | . | NA | NA | NA       | NA   | nonsynonymous SNV | NM_001098672 | exon6  | c.G1189T | p.G397C  |
| Clonal | chr18 | 28226897  | T | C | GAREM    | . | NA | NA | 0.992    | 0.02 | nonsynonymous SNV | NM_001242409 | exon2  | c.A221G  | p.Y74C   |
| Clonal | chr1  | 150549566 | G | A | FLG      | . | NA | NA | 0.524509 | 0.27 | stopgain SNV      | NM_002016    | exon3  | c.C4420T | p.R1474X |
| Clonal | chr12 | 69235341  | G | C | PTPRB    | . | NA | NA | NA       | 0    | nonsynonymous SNV | NM_001206971 | exon17 | c.C4085G | p.P1362R |
| Clonal | chr14 | 68598931  | G | A | DCAF5    | . | NA | NA | 0.735527 | NA   | stopgain SNV      | NM_003861    | exon8  | c.C997T  | p.R333X  |
| Clonal | chr11 | 45789078  | C | T | SLC35C1  | . | NA | NA | NA       | NA   | synonymous SNV    | NM_001145265 | exon3  | c.C672T  | p.N224N  |
| Clonal | chr8  | 119662258 | A | G | SAMD12   | . | NA | NA | NA       | NA   | synonymous SNV    | NM_001101676 | exon2  | c.T69C   | p.G23G   |
| Clonal | chr6  | 43301484  | C | A | DNPH1    | . | NA | NA | 0.119    | 0.03 | nonsynonymous SNV | NM_006443    | exon4  | c.G490T  | p.G164W  |
| Clonal | chr19 | 47603350  | G | A | LIPE     | . | NA | NA | NA       | NA   | synonymous SNV    | NM_005357    | exon6  | c.C1953T | p.H651H  |
| Clonal | chr7  | 92568606  | G | T | SAMD9    | . | NA | NA | 0.885    | 0.15 | nonsynonymous SNV | NM_001193307 | exon2  | c.C4741A | p.P1581T |
| Clonal | chr1  | 12809901  | C | T | PRAMEF11 | . | NA | NA | NA       | NA   | synonymous SNV    | NM_001146344 | exon3  | c.G543A  | p.L181L  |

|        |       |           |   |   |           |   |    |      |          |      |                   |              |        |          |          |
|--------|-------|-----------|---|---|-----------|---|----|------|----------|------|-------------------|--------------|--------|----------|----------|
| Clonal | chr4  | 38474861  | C | A | TLR1      | . | NA | NA   | 0        | 0.01 | nonsynonymous SNV | NM_003263    | exon4  | c.G1987T | p.G663C  |
| Clonal | chr2  | 73530918  | C | A | ALMS1     | . | NA | NA   | NA       | NA   | synonymous SNV    | NM_015120    | exon8  | c.C3753A | p.V1251V |
| Clonal | chr18 | 42281616  | T | G | RNF165    | . | NA | NA   | 0.979    | 0    | nonsynonymous SNV | NM_152470    | exon4  | c.T578G  | p.M193R  |
| Clonal | chr19 | 62659243  | G | A | VN1R1     | . | NA | NA   | 0.314    | 0    | nonsynonymous SNV | NM_020633    | exon1  | c.C424T  | p.L142F  |
| Clonal | chrX  | 17656289  | C | T | NHS       | . | NA | NA   | 0.841    | 0.01 | nonsynonymous SNV | NM_001136024 | exon7  | c.C3611T | p.S1204L |
| Clonal | chr6  | 161389811 | T | G | MAP3K4    | . | NA | NA   | 0.956    | 0.05 | nonsynonymous SNV | NM_006724    | exon3  | c.T517G  | p.S173A  |
| Clonal | chr11 | 117489271 | C | T | TMPRSS4   | . | NA | NA   | 0.339    | 0.14 | nonsynonymous SNV | NM_001173551 | exon9  | c.C815T  | p.A272V  |
| Clonal | chr11 | 4901738   | G | A | OR51G1    | . | NA | NA   | NA       | NA   | synonymous SNV    | NM_001005237 | exon1  | c.C408T  | p.T136T  |
| Clonal | chr19 | 51109392  | G | A | NANOS2    | . | NA | NA   | 0.999    | 0    | nonsynonymous SNV | NM_001029861 | exon1  | c.C400T  | p.R134C  |
| Clonal | chr6  | 50918917  | C | T | TFAP2B    | . | NA | NA   | NA       | NA   | synonymous SNV    | NM_003221    | exon7  | c.C1236T | p.A412A  |
| Clonal | chr19 | 13802590  | G | A | ZSWIM4    | . | NA | NA   | 0.874    | 0.36 | nonsynonymous SNV | NM_023072    | exon13 | c.G2696A | p.R899H  |
| Clonal | chr6  | 107497407 | G | A | BEND3     | . | NA | NA   | 0.993    | 0    | nonsynonymous SNV | NM_001080450 | exon5  | c.C1681T | p.R561C  |
| Clonal | chr12 | 113603240 | G | C | TBX3      | . | NA | NA   | 1        | 0    | nonsynonymous SNV | NM_005996    | exon2  | c.C484G  | p.R162G  |
| Clonal | chr14 | 23969936  | C | A | KHNYN     | . | NA | NA   | 0.813    | 0    | nonsynonymous SNV | NM_015299    | exon2  | c.C160A  | p.L54M   |
| Clonal | chr10 | 45276747  | G | A | MARCH8    | . | NA | NA   | 0.789104 | 0    | nonsynonymous SNV | NM_001002266 | exon5  | c.C361T  | p.R121C  |
| Clonal | chr13 | 97626985  | C | T | RNF113B   | . | NA | NA   | NA       | NA   | synonymous SNV    | NM_178861    | exon1  | c.G507A  | p.S169S  |
| Clonal | chr16 | 30920365  | C | G | STX1B     | . | NA | NA   | 0.003    | 0.03 | nonsynonymous SNV | NM_052874    | exon2  | c.G91C   | p.E31Q   |
| Clonal | chr19 | 8521159   | C | T | MYO1F     | . | NA | NA   | 0.685    | 0.03 | nonsynonymous SNV | NM_012335    | exon10 | c.G986A  | p.R329H  |
| Clonal | chr21 | 44795059  | G | A | KRTAP10-2 | . | NA | NA   | NA       | NA   | synonymous SNV    | NM_198693    | exon1  | c.C711T  | p.P237P  |
| Clonal | chr4  | 103737794 | C | T | NFKB1     | . | NA | NA   | NA       | NA   | synonymous SNV    | NM_001165412 | exon15 | c.C1572T | p.D524D  |
| Clonal | chr21 | 44795071  | G | A | KRTAP10-2 | . | NA | NA   | NA       | NA   | synonymous SNV    | NM_198693    | exon1  | c.C699T  | p.L233L  |
| Clonal | chr3  | 185583815 | G | T | CHRD      | . | NA | NA   | 0.983    | 0.01 | nonsynonymous SNV | NM_003741    | exon11 | c.G1235T | p.G412V  |
| Clonal | chr5  | 161048856 | C | T | GABRA6    | . | NA | NA   | NA       | NA   | synonymous SNV    | NM_000811    | exon5  | c.C465T  | p.D155D  |
| Clonal | chr20 | 47167864  | C | T | STAU1     | . | NA | NA   | 0.937    | 0    | nonsynonymous SNV | NM_017452    | exon10 | c.G1123A | p.A375T  |
| Clonal | chr20 | 33605568  | G | C | ERGIC3    | . | NA | NA   | 0.14     | 0.47 | nonsynonymous SNV | NM_198398    | exon8  | c.G697C  | p.E233Q  |
| Clonal | chr11 | 64513555  | G | T | BATF2     | . | NA | NA   | NA       | NA   | synonymous SNV    | NM_138456    | exon3  | c.C447A  | p.L149L  |
| Clonal | chr1  | 176690275 | C | T | RASAL2    | . | NA | NA   | 0.917    | 0    | nonsynonymous SNV | NM_170692    | exon12 | c.C2080T | p.R694C  |
| Clonal | chr1  | 235068488 | C | A | MTR       | . | NA | NA   | 0.977    | 0    | nonsynonymous SNV | NM_000254    | exon15 | c.C1481A | p.A494D  |
| Clonal | chr7  | 23775286  | C | A | STK31     | . | NA | NA   | 0.102    | 0.01 | nonsynonymous SNV | NM_001260504 | exon12 | c.C1495A | p.R499S  |
| Clonal | chr11 | 77609101  | G | A | GAB2      | . | NA | NA   | 0.999    | 0.09 | nonsynonymous SNV | NM_012296    | exon9  | c.C1685T | p.T562M  |
| Clonal | chrX  | 54486634  | C | T | TSR2      | . | NA | NA   | NA       | NA   | synonymous SNV    | NM_058163    | exon3  | c.C249T  | p.D83D   |
| Clonal | chr15 | 62578773  | C | G | ZNF609    | . | NA | NA   | NA       | NA   | synonymous SNV    | NM_015042    | exon1  | c.C102G  | p.L34L   |
| Clonal | chr8  | 23162822  | G | A | CHMP7     | . | NA | NA   | 0.023    | 0.29 | nonsynonymous SNV | NM_152272    | exon3  | c.G454A  | p.A152T  |
| Clonal | chr16 | 30643283  | G | A | SRCAP     | . | NA | NA   | NA       | NA   | synonymous SNV    | NM_006662    | exon25 | c.G5037A | p.Q1679Q |
| Clonal | chr14 | 23975446  | T | C | KHNYN     | . | NA | NA   | NA       | NA   | synonymous SNV    | NM_015299    | exon7  | c.T1698C | p.F566F  |
| Clonal | chr1  | 156702186 | A | T | OR10K1    | . | NA | NA   | 0.021    | 0.01 | nonsynonymous SNV | NM_001004473 | exon1  | c.A211T  | p.I71F   |
| Clonal | chr1  | 32276060  | C | T | KHDRBS1   | . | NA | NA   | 0.854    | 0.01 | nonsynonymous SNV | NM_006559    | exon6  | c.C943T  | p.R315C  |
| Clonal | chr1  | 154883415 | G | A | BCAN      | . | NA | NA   | 1        | 0.14 | nonsynonymous SNV | NM_021948    | exon3  | c.G290A  | p.R97H   |
| Clonal | chr5  | 75990240  | A | C | IQGAP2    | . | NA | NA   | 0.98     | 0    | nonsynonymous SNV | NM_006633    | exon21 | c.A2521C | p.T841P  |
| Clonal | chrX  | 10495556  | G | T | MID1      | . | NA | NA   | 0.999    | 0    | nonsynonymous SNV | NM_001193277 | exon2  | c.C32A   | p.P11H   |
| Clonal | chr19 | 17602544  | G | T | UNC13A    | . | NA | NA   | NA       | 0.08 | nonsynonymous SNV | NM_001080421 | exon28 | c.C3444A | p.F1148L |
| Clonal | chr1  | 172139794 | A | G | SERPINC1  | . | NA | NA   | NA       | NA   | synonymous SNV    | NM_000488    | exon7  | c.T1251C | p.S417S  |
| Clonal | chr16 | 18963792  | G | C | TMC7      | . | NA | NA   | 0        | 0.28 | nonsynonymous SNV | NM_001160364 | exon10 | c.G1093C | p.D365H  |
| Clonal | chr8  | 22062341  | C | T | LG13      | . | NA | NA   | 0.735256 | 0.18 | stopgain SNV      | NM_139278    | exon8  | c.G924A  | p.W308X  |
| Clonal | chr15 | 83204028  | C | T | ALPK3     | . | NA | NA   | 0.995    | 0.01 | nonsynonymous SNV | NM_020778    | exon8  | c.C4589T | p.P1530L |
| Clonal | chr11 | 16833062  | G | A | PLEKHA7   | . | NA | NA   | 0.997    | 0    | nonsynonymous SNV | NM_175058    | exon6  | c.C472T  | p.R158W  |
| Clonal | chr17 | 35601217  | G | C | RAPGEFL1  | . | NA | NA   | 0.137    | 0.44 | nonsynonymous SNV | NM_016339    | exon9  | c.G841C  | p.E281Q  |
| Clonal | chr12 | 76939694  | G | A | NAV3      | . | NA | NA   | NA       | NA   | synonymous SNV    | NM_014903    | exon9  | c.G1944A | p.S648S  |
| Clonal | chr10 | 102756544 | G | A | LZTS2     | . | NA | NA   | 0        | 0.55 | nonsynonymous SNV | NM_032429    | exon5  | c.G1639A | p.A547T  |
| Clonal | chr5  | 132260575 | G | A | AFF4      | . | NA | AFF4 | 0.99     | 0.07 | nonsynonymous SNV | NM_014423    | exon11 | c.C1646T | p.S549F  |
| Clonal | chr3  | 171633033 | G | A | CLDN11    | . | NA | NA   | 0.735205 | 0    | stopgain SNV      | NM_005602    | exon3  | c.G419A  | p.W140X  |
| Clonal | chr3  | 150406814 | C | T | CP        | . | NA | NA   | 0.13     | 0    | nonsynonymous SNV | NM_000096    | exon6  | c.G1039A | p.G347S  |
| Clonal | chr14 | 51544388  | G | A | NID2      | . | NA | NA   | 0.154    | 0.02 | nonsynonymous SNV | NM_007361    | exon19 | c.C3770T | p.T1257M |
| Clonal | chr19 | 7870931   | C | A | LRRCE8    | . | NA | NA   | NA       | NA   | synonymous SNV    | NM_001268285 | exon2  | c.C1137A | p.G379G  |
| Clonal | chr1  | 166073164 | G | C | ADCY10    | . | NA | NA   | 0.01     | 0    | nonsynonymous SNV | NM_001167749 | exon19 | c.C2565G | p.I855M  |
| Clonal | chr1  | 20517689  | T | C | VWA5B1    | . | NA | NA   | NA       | NA   | synonymous SNV    | NM_001039500 | exon6  | c.T729C  | p.H243H  |

|        |       |           |   |   |          |   |    |    |          |      |                   |              |        |          |          |
|--------|-------|-----------|---|---|----------|---|----|----|----------|------|-------------------|--------------|--------|----------|----------|
| Clonal | chrX  | 47372565  | C | G | CFP      | . | NA | NA | 0.99     | 0.02 | nonsynonymous SNV | NM_002621    | exon4  | c.G283C  | p.E95Q   |
| Clonal | chr19 | 62456657  | C | T | ZNF805   | . | NA | NA | NA       | NA   | nonsynonymous SNV | NM_001023563 | exon4  | c.C658T  | p.R220W  |
| Clonal | chr2  | 69027045  | G | C | GKN2     | . | NA | NA | 0.143    | 0.43 | nonsynonymous SNV | NM_182536    | exon5  | c.C367G  | p.L123V  |
| Clonal | chr19 | 10885628  | G | A | CARM1    | . | NA | NA | 0.244    | 0.05 | nonsynonymous SNV | NM_199141    | exon6  | c.G745A  | p.E249K  |
| Clonal | chr11 | 6218198   | G | A | CNGA4    | . | NA | NA | 0        | 0.88 | nonsynonymous SNV | NM_001037329 | exon4  | c.G598A  | p.A200T  |
| Clonal | chr21 | 45725138  | G | T | COL18A1  | . | NA | NA | 0.73525  | NA   | stopgain SNV      | NM_030582    | exon12 | c.G2089T | p.G697X  |
| Clonal | chr19 | 56218192  | T | C | KLK11    | . | NA | NA | 0.001    | 1    | nonsynonymous SNV | NM_001136032 | exon5  | c.A568G  | p.S190G  |
| Clonal | chr1  | 184621833 | C | T | C1orf27  | . | NA | NA | NA       | 0    | nonsynonymous SNV | NM_001164245 | exon4  | c.C325T  | p.R109C  |
| Clonal | chr11 | 63877439  | G | T | CCDC88B  | . | NA | NA | 0.999    | 0.01 | nonsynonymous SNV | NM_032251    | exon22 | c.G3728T | p.R1243L |
| Clonal | chr7  | 100114009 | G | A | GNB2     | . | NA | NA | 0.548    | 0.05 | nonsynonymous SNV | NM_005273    | exon9  | c.G752A  | p.R251H  |
| Clonal | chrX  | 23658867  | G | A | ACOT9    | . | NA | NA | 0.640186 | NA   | stopgain SNV      | NM_001037171 | exon5  | c.C349T  | p.Q117X  |
| Clonal | chrX  | 16611206  | A | C | CTPS2    | . | NA | NA | 0.619    | 0.01 | nonsynonymous SNV | NM_001144002 | exon9  | c.T937G  | p.C313G  |
| Clonal | chr19 | 53915913  | A | G | RASIP1   | . | NA | NA | 0.945    | 0.01 | nonsynonymous SNV | NM_017805    | exon12 | c.T2846C | p.L949P  |
| Clonal | chr5  | 75616853  | G | A | SV2C     | . | NA | NA | 0.999    | 0    | nonsynonymous SNV | NM_014979    | exon5  | c.G1024A | p.E342K  |
| Clonal | chr1  | 17139087  | C | T | CROCC    | . | NA | NA | 0.999    | 0.02 | nonsynonymous SNV | NM_014675    | exon13 | c.C1720T | p.R574W  |
| Clonal | chr16 | 30685336  | C | G | RNF40    | . | NA | NA | 0.469    | 0.1  | nonsynonymous SNV | NM_014771    | exon10 | c.C1249G | p.L417V  |
| Clonal | chr18 | 58392876  | C | A | ZCCHC2   | . | NA | NA | NA       | 0    | nonsynonymous SNV | NM_017742    | exon13 | c.C2582A | p.P861H  |
| Clonal | chr7  | 99656145  | C | G | PVRIG    | . | NA | NA | 0.036    | 0    | nonsynonymous SNV | NM_024070    | exon4  | c.C509G  | p.A170G  |
| Clonal | chr19 | 61176972  | C | T | NLRP8    | . | NA | NA | 0.999    | 0.58 | nonsynonymous SNV | NM_176811    | exon7  | c.C2677T | p.H893Y  |
| Clonal | chr19 | 60133783  | G | T | NLRP7    | . | NA | NA | NA       | NA   | synonymous SNV    | NM_139176    | exon9  | c.C2622A | p.A874A  |
| Clonal | chr15 | 29610300  | C | T | OTUD7A   | . | NA | NA | 0.996    | 0.08 | nonsynonymous SNV | NM_130901    | exon4  | c.G554A  | p.R185H  |
| Clonal | chr1  | 74782223  | G | A | TNNI3K   | . | NA | NA | 0.004    | 0    | nonsynonymous SNV | NM_015978    | exon25 | c.G2477A | p.R826Q  |
| Clonal | chr1  | 158360390 | A | G | ATP1A2   | . | NA | NA | 0        | 0.35 | nonsynonymous SNV | NM_000702    | exon5  | c.A415G  | p.I139V  |
| Clonal | chr11 | 129498879 | C | T | APLP2    | . | NA | NA | 0        | 0.26 | nonsynonymous SNV | NM_001642    | exon7  | c.C1085T | p.A362V  |
| Clonal | chr5  | 178071778 | C | G | ZNF354A  | . | NA | NA | 0.012    | 0    | nonsynonymous SNV | NM_005649    | exon5  | c.G1707C | p.Q569H  |
| Clonal | chr9  | 115851289 | C | T | ZNF618   | . | NA | NA | NA       | 0.65 | nonsynonymous SNV | NM_133374    | exon14 | c.C1607T | p.A536V  |
| Clonal | chr9  | 37512840  | C | G | FBXO10   | . | NA | NA | NA       | 0.02 | nonsynonymous SNV | NM_012166    | exon7  | c.G1912C | p.E638Q  |
| Clonal | chr9  | 87823044  | G | C | NAA35    | . | NA | NA | 0.999    | 0    | nonsynonymous SNV | NM_024635    | exon20 | c.G1828C | p.D610H  |
| Clonal | chr9  | 128495387 | G | A | LMX1B    | . | NA | NA | NA       | NA   | synonymous SNV    | NM_002316    | exon4  | c.G705A  | p.K235K  |
| Clonal | chr19 | 59317118  | G | T | PRPF31   | . | NA | NA | 0.003    | 0.84 | nonsynonymous SNV | NM_015629    | exon4  | c.G306T  | p.E102D  |
| Clonal | chr11 | 6610301   | A | G | DCHS1    | . | NA | NA | NA       | NA   | synonymous SNV    | NM_003737    | exon6  | c.T3018C | p.R1006R |
| Clonal | chr19 | 50866405  | C | G | GIPR     | . | NA | NA | 0.987    | 0.01 | nonsynonymous SNV | NM_000164    | exon4  | c.C195G  | p.F65L   |
| Clonal | chr1  | 151922589 | C | T | NPR1     | . | NA | NA | NA       | NA   | synonymous SNV    | NM_000906    | exon6  | c.C1377T | p.N459N  |
| Clonal | chr16 | 70273285  | C | T | PHLPP2   | . | NA | NA | 0.334    | 0.15 | nonsynonymous SNV | NM_015020    | exon5  | c.G760A  | p.V254M  |
| Clonal | chr16 | 19396335  | T | C | TMC5     | . | NA | NA | NA       | NA   | synonymous SNV    | NM_024780    | exon9  | c.T1425C | p.G475G  |
| Clonal | chr14 | 75300805  | C | T | TLL5     | . | NA | NA | NA       | NA   | synonymous SNV    | NM_015072    | exon19 | c.C1645T | p.L547L  |
| Clonal | chr2  | 70771463  | C | T | ADD2     | . | NA | NA | 0.996    | 0.02 | nonsynonymous SNV | NM_001185054 | exon8  | c.G812A  | p.R271Q  |
| Clonal | chr15 | 64397992  | G | A | DIS3L    | . | NA | NA | NA       | NA   | synonymous SNV    | NM_001143688 | exon8  | c.G1146A | p.Q382Q  |
| Clonal | chr7  | 107402741 | T | C | LAMB1    | . | NA | NA | 0.002    | 0.18 | nonsynonymous SNV | NM_002291    | exon12 | c.A1408G | p.N470D  |
| Clonal | chr11 | 74224338  | C | T | RNF169   | . | NA | NA | 1        | NA   | nonsynonymous SNV | NM_001098638 | exon6  | c.C1042T | p.R348C  |
| Clonal | chr19 | 7490909   | C | T | ZNF358   | . | NA | NA | 0.999    | NA   | nonsynonymous SNV | NM_018083    | exon2  | c.C781T  | p.R261W  |
| Clonal | chr19 | 10435587  | G | A | PDE4A    | . | NA | NA | 0.999    | 0.01 | nonsynonymous SNV | NM_001111309 | exon14 | c.G1679A | p.R560H  |
| Clonal | chr19 | 7713933   | G | C | CD209    | . | NA | NA | 0.271898 | 0.24 | nonsynonymous SNV | NM_001144894 | exon5  | c.C1075G | p.P359A  |
| Clonal | chr9  | 21156083  | A | T | IFNA21   | . | NA | NA | 0.001    | 0.01 | nonsynonymous SNV | NM_002175    | exon1  | c.T529A  | p.L177I  |
| Clonal | chr1  | 41820217  | C | G | HIVEP3   | . | NA | NA | 0.84     | 0.24 | nonsynonymous SNV | NM_024503    | exon4  | c.G2839C | p.A947P  |
| Clonal | chr1  | 151928920 | C | T | NPR1     | . | NA | NA | NA       | NA   | synonymous SNV    | NM_000906    | exon19 | c.C2772T | p.G924G  |
| Clonal | chr16 | 4431493   | C | T | DNAJA3   | . | NA | NA | NA       | NA   | synonymous SNV    | NM_001135110 | exon4  | c.C546T  | p.P182P  |
| Clonal | chr18 | 7016032   | C | A | LAMA1    | . | NA | NA | 1        | 0    | nonsynonymous SNV | NM_005559    | exon17 | c.G2348T | p.G783V  |
| Clonal | chrX  | 36938656  | G | A | FAM47C   | . | NA | NA | 0.056    | 0.06 | nonsynonymous SNV | NM_001013736 | exon1  | c.G2252A | p.R751H  |
| Clonal | chr16 | 30278031  | C | T | TBC1D10B | . | NA | NA | NA       | NA   | synonymous SNV    | NM_015527    | exon7  | c.G1605A | p.A535A  |
| Clonal | chr7  | 65741614  | G | A | KCTD7    | . | NA | NA | 0.999    | 0.02 | nonsynonymous SNV | NM_001167961 | exon4  | c.G830A  | p.C277Y  |
| Clonal | chr19 | 17756592  | G | T | FCHO1    | . | NA | NA | 0.838    | 0.13 | nonsynonymous SNV | NM_001161359 | exon24 | c.G2135T | p.G712V  |
| Clonal | chr16 | 3433149   | C | T | ZNF597   | . | NA | NA | NA       | NA   | synonymous SNV    | NM_152457    | exon2  | c.G6A    | p.A2A    |
| Clonal | chr11 | 19034291  | G | T | MRGPRX2  | . | NA | NA | 0.576    | 0.09 | nonsynonymous SNV | NM_054030    | exon2  | c.C235A  | p.L79I   |
| Clonal | chr14 | 20560132  | G | C | NDRG2    | . | NA | NA | 0.911    | 0.01 | nonsynonymous SNV | NM_016250    | exon5  | c.C231G  | p.I77M   |
| Clonal | chrX  | 132300894 | C | T | GPC4     | . | NA | NA | 0.999    | 0.01 | nonsynonymous SNV | NM_001448    | exon2  | c.G302A  | p.R101H  |

|                      |       |           |   |   |          |   |      |       |          |      |                   |                   |           |          |          |         |
|----------------------|-------|-----------|---|---|----------|---|------|-------|----------|------|-------------------|-------------------|-----------|----------|----------|---------|
| Clonal               | chr1  | 78875334  | G | A | IFI44L   | . | NA   | NA    | NA       | NA   | synonymous SNV    | NM_006820         | exon6     | c.G906A  | p.E302E  |         |
| Clonal               | chr13 | 100510177 | T | C | NALCN    | . | NA   | NA    | NA       | NA   | synonymous SNV    | NM_052867         | exon42    | c.A4899G | p.Q1633Q |         |
| Clonal               | chr7  | 139438201 | G | T | JHDM1D   | . | NA   | NA    | NA       | 0    | NA                | nonsynonymous SNV | NM_030647 | exon19   | c.C2603A | p.A868E |
| Clonal               | chr4  | 1923647   | G | A | WHSC1    | . | NA   | WHSC1 | NA       | NA   | synonymous SNV    | NM_133331         | exon12    | c.G2028A | p.P676P  |         |
| Clonal               | chr15 | 68912309  | C | T | LARP6    | . | NA   | NA    | NA       | NA   | synonymous SNV    | NM_018357         | exon3     | c.G612A  | p.Q204Q  |         |
| Clonal               | chr11 | 102247802 | C | T | UNKNOWN  | . | NA   | NA    | NA       | NA   | unknown           |                   |           |          |          |         |
| Clonal               | chrX  | 13705439  | C | T | GPM6B    | . | NA   | NA    | 0.997    | 0.1  | nonsynonymous SNV | NM_001001994      | exon5     | c.G547A  | p.G183R  |         |
| Clonal               | chr14 | 34304053  | G | A | BAZ1A    | . | NA   | NA    | NA       | NA   | synonymous SNV    | NM_013448         | exon22    | c.C3474T | p.G1158G |         |
| Clonal               | chr15 | 40372284  | T | C | GANC     | . | NA   | NA    | 0.181    | 0.2  | nonsynonymous SNV | NM_198141         | exon5     | c.T389C  | p.L130P  |         |
| Clonal               | chr1  | 155205752 | C | T | ARHGEF11 | . | NA   | NA    | NA       | NA   | synonymous SNV    | NM_198236         | exon10    | c.G771A  | p.Q257Q  |         |
| Clonal               | chr1  | 113438839 | C | T | LRIG2    | . | NA   | NA    | 1        | 0.01 | nonsynonymous SNV | NM_014813         | exon6     | c.C742T  | p.R248W  |         |
| Clonal               | chr1  | 154302398 | A | G | RAB25    | . | NA   | NA    | 0.991    | 0.01 | nonsynonymous SNV | NM_020387         | exon2     | c.A116G  | p.H39R   |         |
| Clonal               | chr21 | 46633149  | G | A | PCNT     | . | NA   | NA    | 0.009    | 0.15 | nonsynonymous SNV | NM_006031         | exon18    | c.G3529A | p.V1177I |         |
| Clonal               | chrX  | 100497875 | C | T | BTK      | . | NA   | NA    | 0.988    | 0.01 | nonsynonymous SNV | NM_000061         | exon15    | c.G1387A | p.V463I  |         |
| Clonal               | chr1  | 224628639 | T | C | PARP1    | . | NA   | NA    | 0.021    | 0.24 | nonsynonymous SNV | NM_001618         | exon14    | c.A1981G | p.T661A  |         |
| Clonal               | chr1  | 199552431 | G | A | PKP1     | . | NA   | NA    | 0.157    | 0.26 | nonsynonymous SNV | NM_000299         | exon4     | c.G829A  | p.E277K  |         |
| Clonal               | chr7  | 92601510  | G | T | SAMD9L   | . | NA   | NA    | 0.115    | 0.21 | nonsynonymous SNV | NM_152703         | exon5     | c.C1711A | p.L571I  |         |
| Clonal               | chr20 | 2794141   | G | A | VPS16    | . | NA   | NA    | NA       | NA   | synonymous SNV    | NM_080413         | exon18    | c.G1839A | p.L613L  |         |
| Clonal               | chr6  | 31702873  | G | A | PRRC2A   | . | NA   | NA    | NA       | NA   | synonymous SNV    | NM_004638         | exon11    | c.G1209A | p.P403P  |         |
| Clonal               | chr1  | 120267911 | C | T | NOTCH2   | . | NA   | NA    | NA       | NA   | synonymous SNV    | NM_024408         | exon26    | c.G4731A | p.L1577L |         |
| Clonal               | chr14 | 51804602  | C | T | PTGDR    | . | NA   | NA    | 0.06     | 0.5  | nonsynonymous SNV | NM_000953         | exon1     | c.C320T  | p.A107V  |         |
| Clonal               | chr6  | 144128533 | A | C | PHACTR2  | . | NA   | NA    | 0.891    | 0.03 | nonsynonymous SNV | NM_001100165      | exon5     | c.A897C  | p.L299F  |         |
| Clonal               | chr20 | 47689689  | G | A | B4GALT5  | . | NA   | NA    | 0.004    | 0.01 | nonsynonymous SNV | NM_004776         | exon7     | c.C850T  | p.R284W  |         |
| Clonal               | chr6  | 111042482 | C | T | CDK19    | . | NA   | NA    | NA       | NA   | synonymous SNV    | NM_015076         | exon13    | c.G1458A | p.S486S  |         |
| Clonal               | chr11 | 64323677  | C | T | MAP4K2   | . | NA   | NA    | 0.651    | 0.47 | nonsynonymous SNV | NM_004579         | exon13    | c.G970A  | p.E324K  |         |
| Clonal               | chr3  | 36871718  | C | T | TRANK1   | . | NA   | NA    | NA       | NA   | nonsynonymous SNV | NM_014831         | exon12    | c.G4367A | p.R1456Q |         |
| Clonal               | chr4  | 40135366  | C | T | RBM47    | . | NA   | NA    | 1        | 0    | nonsynonymous SNV | NM_019027         | exon3     | c.G302A  | p.R101H  |         |
| Clonal               | chr16 | 22988255  | C | A | USP31    | . | NA   | NA    | 0.017    | 0.02 | nonsynonymous SNV | NM_020718         | exon16    | c.G2672T | p.S891I  |         |
| Clonal               | chr1  | 164306443 | C | T | FAM78B   | . | NA   | NA    | 0.195    | 0.24 | nonsynonymous SNV | NM_001017961      | exon2     | c.G445A  | p.A149T  |         |
| Clonal               | chr19 | 10195794  | G | C | S1PR2    | . | NA   | NA    | 0.017    | 0.01 | nonsynonymous SNV | NM_004230         | exon2     | c.C788G  | p.S263C  |         |
| Clonal               | chr2  | 85719846  | G | T | USP39    | . | NA   | NA    | 0.642067 | 0.25 | stopgain SNV      | NM_006590         | exon9     | c.G1105T | p.E369X  |         |
| Clonal               | chr7  | 82421586  | T | C | PCL0     | . | NA   | NA    | NA       | NA   | nonsynonymous SNV | NM_033026         | exon5     | c.A6619G | p.T2207A |         |
| Clonal               | chr6  | 149436760 | G | A | UST      | . | NA   | NA    | 0.617    | 0.01 | nonsynonymous SNV | NM_005715         | exon8     | c.G1036A | p.E346K  |         |
| Clonal               | chr6  | 36036768  | G | A | SLC26A8  | . | NA   | NA    | NA       | NA   | synonymous SNV    | NM_052961         | exon13    | c.C1548T | p.I516I  |         |
| Clonal               | chr11 | 60459416  | G | C | TMEM132A | . | NA   | NA    | 0.778    | 0.04 | nonsynonymous SNV | NM_017870         | exon10    | c.G1956C | p.L652F  |         |
| Clonal               | chr6  | 138686600 | G | A | KIAA1244 | . | NA   | NA    | NA       | NA   | synonymous SNV    | NM_020340         | exon30    | c.G4866A | p.V1622V |         |
| Clonal               | chr19 | 50896961  | G | A | QPCTL    | . | NA   | NA    | 0.95     | 0.08 | nonsynonymous SNV | NM_017659         | exon6     | c.G952A  | p.G318R  |         |
| Clonal               | chr6  | 43520541  | G | T | ABCC10   | . | NA   | NA    | 1        | 0    | nonsynonymous SNV | NM_001198934      | exon13    | c.G2727T | p.W909C  |         |
| Clonal               | chr1  | 148794633 | G | T | ADAMTSL4 | . | NA   | NA    | 0        | 1    | nonsynonymous SNV | NM_019032         | exon8     | c.G1339T | p.A447S  |         |
| Clonal               | chr16 | 45518404  | G | A | GPT2     | . | NA   | NA    | 0.901    | 0    | nonsynonymous SNV | NM_001142466      | exon11    | c.G1135A | p.V379M  |         |
| Clonal               | chr11 | 66149270  | C | T | RBM14    | . | NA   | NA    | NA       | NA   | synonymous SNV    | NM_006328         | exon2     | c.C1347T | p.Y449Y  |         |
| Clonal               | chr19 | 16527182  | C | T | SLC35E1  | . | NA   | NA    | NA       | NA   | synonymous SNV    | NM_024881         | exon5     | c.G783A  | p.T261T  |         |
| Clonal               | chr19 | 9438374   | C | T | ZNF560   | . | NA   | NA    | 0.973    | 0.14 | nonsynonymous SNV | NM_152476         | exon10    | c.G2249A | p.R750H  |         |
| Clonal               | chr6  | 138244039 | G | A | TNFAIP3  | . | p.0? | NA    | 0.027    | 0.28 | nonsynonymous SNV | NM_006290         | exon9     | c.G2263A | p.E755K  |         |
| Clonal               | chr14 | 61611826  | C | A | SYT16    | . | NA   | NA    | NA       | NA   | synonymous SNV    | NM_031914         | exon3     | c.C957A  | p.S319S  |         |
| Clonal               | chr1  | 148750893 | T | C | ECM1     | . | NA   | NA    | 1        | 0    | nonsynonymous SNV | NM_004425         | exon7     | c.T1045C | p.C349R  |         |
| Clonal               | chr3  | 99555803  | C | T | OR5K4    | . | NA   | NA    | 0.746    | 0.06 | nonsynonymous SNV | NM_001005517      | exon1     | c.C416T  | p.T139M  |         |
| Clonal               | chr20 | 61045457  | G | A | GID8     | . | NA   | NA    | 0.025    | 0.01 | nonsynonymous SNV | NM_017896         | exon4     | c.G481A  | p.G161R  |         |
| Clonal               | chr19 | 13889899  | C | T | CC2D1A   | . | NA   | NA    | NA       | NA   | synonymous SNV    | NM_017721         | exon7     | c.C765T  | p.G255G  |         |
| Tumor Subclone 1 & 3 | chr19 | 60403609  | G | A | PTPRH    | . | NA   | NA    | NA       | NA   | synonymous SNV    | NM_002842         | exon7     | c.C1227T | p.P409P  |         |
| Tumor Subclone 1 & 3 | chr2  | 216669107 | A | C | TMEM169  | . | NA   | NA    | 0.052    | 1    | nonsynonymous SNV | NM_001142311      | exon2     | c.A176C  | p.N59T   |         |
| Tumor Subclone 1 & 3 | chr5  | 76006183  | A | G | IQGAP2   | . | NA   | NA    | NA       | NA   | synonymous SNV    | NM_006633         | exon27    | c.A3420G | p.S1140S |         |
| Tumor Subclone 1 & 3 | chr11 | 85134422  | A | G | SYTL2    | . | NA   | NA    | 0.535141 | 0    | nonsynonymous SNV | NM_032943         | exon4     | c.T295C  | p.W99R   |         |
| Tumor Subclone 1 & 3 | chr9  | 118500654 | G | A | TRIM32   | . | NA   | NA    | 0.002    | 0.49 | nonsynonymous SNV | NM_001099679      | exon2     | c.G812A  | p.R271Q  |         |
| Tumor Subclone 1 & 3 | chr9  | 34253146  | C | A | KIF24    | . | NA   | NA    | NA       | 0    | nonsynonymous SNV | NM_194313         | exon9     | c.G1468T | p.D490Y  |         |
| Tumor Subclone 1 & 3 | chr19 | 51135931  | G | A | NOVA2    | . | NA   | NA    | 0.72055  | 0.01 | nonsynonymous SNV | NM_002516         | exon4     | c.C509T  | p.P170L  |         |

|                      |       |           |   |   |           |   |         |      |          |      |                   |              |        |          |          |
|----------------------|-------|-----------|---|---|-----------|---|---------|------|----------|------|-------------------|--------------|--------|----------|----------|
| Tumor Subclone 1 & 3 | chr15 | 50323890  | G | A | MYO5C     | . | NA      | NA   | 0.009    | 0.08 | nonsynonymous SNV | NM_018728    | exon19 | c.C2345T | p.A782V  |
| Tumor Subclone 1 & 3 | chr9  | 129981450 | C | A | CIZ1      | . | NA      | NA   | 0.999    | 0.01 | nonsynonymous SNV | NM_001131015 | exon8  | c.G857T  | p.R286L  |
| Tumor Subclone 1 & 3 | chr20 | 42998735  | C | T | PABPC1L   | . | NA      | NA   | 0.957    | 0    | nonsynonymous SNV | NM_001124756 | exon12 | c.C1595T | p.T532I  |
| Tumor Subclone 1 & 3 | chr7  | 103564472 | A | C | ORC5      | . | NA      | NA   | NA       | NA   | synonymous SNV    | NM_002553    | exon13 | c.T1254G | p.A418A  |
| Tumor Subclone 1 & 3 | chr1  | 242594629 | A | G | C1orf100  | . | NA      | NA   | 0.002    | 0.17 | nonsynonymous SNV | NM_001276349 | exon2  | c.A4G    | p.T2A    |
| Tumor Subclone 1 & 3 | chr9  | 137913423 | G | T | CAMSAP1   | . | NA      | NA   | NA       | NA   | synonymous SNV    | NM_015447    | exon3  | c.C462A  | p.A154A  |
| Tumor Subclone 1 & 3 | chr9  | 122260634 | C | T | CDK5RAP2  | . | NA      | NA   | 0        | 0.59 | nonsynonymous SNV | NM_018249    | exon20 | c.G2290A | p.A764T  |
| Tumor Subclone 1 & 3 | chr7  | 77645317  | T | C | MAGI2     | . | NA      | NA   | 0.981    | 0.27 | nonsynonymous SNV | NM_012301    | exon14 | c.A2350G | p.M784V  |
| Tumor Subclone 1 & 3 | chr15 | 39828307  | T | C | MGA       | . | NA      | NA   | NA       | NA   | nonsynonymous SNV | NM_001164273 | exon16 | c.T5393C | p.M1798T |
| Tumor Subclone 2     | chr2  | 232030747 | T | C | NCL       | . | NA      | NA   | 0.673    | 0    | nonsynonymous SNV | NM_005381    | exon9  | c.A1298G | p.Y433C  |
| Tumor Subclone 2     | chr15 | 32142634  | C | T | CHRM5     | . | p.R142C | NA   | 1        | 0    | nonsynonymous SNV | NM_012125    | exon3  | c.C424T  | p.R142C  |
| Tumor Subclone 2     | chr11 | 28274927  | G | T | METTL15   | . | NA      | NA   | 0.871    | 0.15 | nonsynonymous SNV | NM_152636    | exon6  | c.G651T  | p.Q217H  |
| Tumor Subclone 2     | chr1  | 43808031  | G | A | PTPRF     | . | NA      | NA   | 0.999    | 0.02 | nonsynonymous SNV | NM_130440    | exon6  | c.G563A  | p.R188H  |
| Tumor Subclone 2     | chr19 | 10063188  | C | T | C19orf66  | . | NA      | NA   | NA       | NA   | synonymous SNV    | NM_018381    | exon7  | c.C525T  | p.Y175Y  |
| Tumor Subclone 2     | chr19 | 40741899  | C | T | ATP4A     | . | NA      | NA   | 0        | 0.03 | nonsynonymous SNV | NM_000704    | exon8  | c.G1091A | p.S364N  |
| Tumor Subclone 2     | chr4  | 5675245   | C | T | EVC2      | . | NA      | NA   | NA       | NA   | synonymous SNV    | NM_001166136 | exon14 | c.G2181A | p.R727R  |
| Tumor Subclone 2     | chr19 | 19101983  | C | T | TMEM161A  | . | NA      | NA   | 0.998    | 0.01 | nonsynonymous SNV | NM_017814    | exon6  | c.G577A  | p.E193K  |
| Tumor Subclone 2     | chr5  | 176619604 | A | G | NSD1      | . | NA      | NSD1 | 0.426    | 0.05 | nonsynonymous SNV | NM_022455    | exon14 | c.A4975G | p.M1659V |
| Tumor Subclone 2     | chr15 | 92728327  | T | C | MCTP2     | . | NA      | NA   | 0.998    | 0    | nonsynonymous SNV | NM_001159643 | exon12 | c.T1655C | p.L552P  |
| Tumor Subclone 2     | chr11 | 57715280  | G | A | OR9Q2     | . | NA      | NA   | 0.907    | 0    | nonsynonymous SNV | NM_001005283 | exon1  | c.G742A  | p.V248I  |
| Tumor Subclone 2     | chr4  | 5628937   | C | T | EVC2      | . | NA      | NA   | 0.99     | 1    | nonsynonymous SNV | NM_001166136 | exon18 | c.G2963A | p.R988K  |
| Tumor Subclone 2     | chr3  | 120808478 | A | G | PLA1A     | . | NA      | NA   | 0.302    | 0.07 | nonsynonymous SNV | NM_015900    | exon2  | c.A241G  | p.T81A   |
| Tumor Subclone 2     | chr10 | 13214134  | A | G | OPTN      | . | NA      | NA   | 0.616    | 0    | nonsynonymous SNV | NM_021980    | exon12 | c.A1463G | p.E488G  |
| Tumor Subclone 2     | chr3  | 46698570  | C | T | ALS2CL    | . | NA      | NA   | NA       | NA   | synonymous SNV    | NM_001190707 | exon11 | c.G1128A | p.P376P  |
| Tumor Subclone 2     | chr11 | 61303399  | G | A | MYRF      | . | NA      | NA   | 0.999    | 0.04 | nonsynonymous SNV | NM_013279    | exon15 | c.G2075A | p.R692H  |
| Tumor Subclone 2     | chr7  | 83429029  | C | T | SEMA3A    | . | NA      | NA   | 0.999    | 0.03 | nonsynonymous SNV | NM_006080    | exon17 | c.G1910A | p.R637H  |
| Tumor Subclone 2     | chr5  | 137504297 | A | T | BRD8      | . | NA      | NA   | 0.137    | 0    | nonsynonymous SNV | NM_139199    | exon26 | c.T3611A | p.I1204N |
| Tumor Subclone 2     | chr1  | 234036347 | C | A | LYST      | . | NA      | NA   | NA       | NA   | synonymous SNV    | NM_000081    | exon6  | c.G2712T | p.V904V  |
| Tumor Subclone 2     | chr14 | 62741434  | G | A | RHOJ      | . | NA      | NA   | 0.407    | 0    | nonsynonymous SNV | NM_020663    | exon1  | c.G94A   | p.V32M   |
| Tumor Subclone 2     | chr1  | 181122892 | C | T | DHX9      | . | NA      | NA   | NA       | NA   | synonymous SNV    | NM_001357    | exon28 | c.C3513T | p.S1171S |
| Tumor Subclone 2     | chr1  | 38038016  | C | A | MANEAL    | . | NA      | NA   | 0.997    | 0.03 | nonsynonymous SNV | NM_152496    | exon2  | c.C262A  | p.H88N   |
| Tumor Subclone 2     | chr11 | 123106605 | G | A | ZNF202    | . | NA      | NA   | 0.725252 | 0.58 | stopgain SNV      | NM_003455    | exon4  | c.C202T  | p.R68X   |
| Tumor Subclone 2     | chr6  | 157192179 | C | T | ARID1B    | . | NA      | NA   | 0.992    | 0    | nonsynonymous SNV | NM_017519    | exon2  | c.C1669T | p.R557W  |
| Tumor Subclone 2     | chr19 | 10126351  | G | A | DNMT1     | . | NA      | NA   | NA       | NA   | synonymous SNV    | NM_001130823 | exon21 | c.C1743T | p.D581D  |
| Tumor Subclone 2     | chr1  | 202088131 | C | G | ZC3H11A   | . | NA      | NA   | 0.646733 | 0.03 | stopgain SNV      | NM_014827    | exon20 | c.C2414G | p.S805X  |
| Tumor Subclone 2     | chr5  | 39170767  | C | T | FYB       | . | NA      | NA   | NA       | NA   | nonsynonymous SNV | NM_199335    | exon8  | c.G1622A | p.R541H  |
| Tumor Subclone 2     | chr11 | 129245178 | C | A | NFRKB     | . | NA      | NA   | 0.991    | 0.11 | nonsynonymous SNV | NM_001143835 | exon24 | c.G2952T | p.Q984H  |
| Tumor Subclone 2     | chr14 | 23678497  | T | C | EMC9      | . | NA      | NA   | 0.989    | 0.25 | nonsynonymous SNV | NM_016049    | exon5  | c.A352G  | p.N118D  |
| Tumor Subclone 2     | chr5  | 180592485 | G | A | TRIM41    | . | NA      | NA   | 0.222    | 0.24 | nonsynonymous SNV | NM_033549    | exon3  | c.G1130A | p.R377Q  |
| Tumor Subclone 2     | chr8  | 24827761  | C | T | NEFM      | . | NA      | NA   | 0.785343 | 0    | nonsynonymous SNV | NM_005382    | exon1  | c.C550T  | p.R184W  |
| Tumor Subclone 2     | chr21 | 31561077  | C | T | TIAM1     | . | NA      | NA   | 0.993    | 0    | nonsynonymous SNV | NM_003253    | exon5  | c.G83A   | p.R28H   |
| Tumor Subclone 2     | chr15 | 43036445  | G | A | C15orf43  | . | NA      | NA   | 0.812    | 0    | nonsynonymous SNV | NM_152448    | exon2  | c.G124A  | p.A42T   |
| Tumor Subclone 2     | chr13 | 100561568 | G | A | NALCN     | . | NA      | NA   | 0.735469 | 0.19 | stopgain SNV      | NM_052867    | exon19 | c.C2203T | p.R735X  |
| Tumor Subclone 2     | chr14 | 22914721  | G | A | IL25      | . | NA      | NA   | 0.999    | 0.02 | nonsynonymous SNV | NM_022789    | exon2  | c.G326A  | p.R109H  |
| Tumor Subclone 2     | chr1  | 179969344 | G | A | CACNA1E   | . | NA      | NA   | NA       | 0.38 | nonsynonymous SNV | NM_001205293 | exon21 | c.G3097A | p.A1033T |
| Tumor Subclone 2     | chrX  | 12727439  | G | T | PRPS2     | . | NA      | NA   | 0.610221 | NA   | nonsynonymous SNV | NM_001039091 | exon2  | c.G315T  | p.E105D  |
| Tumor Subclone 2     | chr11 | 93446151  | A | G | HEPHL1    | . | NA      | NA   | NA       | NA   | nonsynonymous SNV | NM_001098672 | exon8  | c.A1402G | p.T468A  |
| Tumor Subclone 2     | chr11 | 44245705  | C | T | ALX4      | . | NA      | NA   | 0.999    | 0    | nonsynonymous SNV | NM_021926    | exon3  | c.G821A  | p.R274H  |
| Tumor Subclone 2     | chr12 | 116777719 | C | T | KSR2      | . | NA      | NA   | NA       | NA   | synonymous SNV    | NM_173598    | exon3  | c.G282A  | p.T94T   |
| Tumor Subclone 2     | chr21 | 30724762  | A | G | KRTAP13-4 | . | NA      | NA   | 1        | 0    | nonsynonymous SNV | NM_181600    | exon1  | c.A298G  | p.R100G  |
| Tumor Subclone 2     | chr16 | 68284688  | G | A | NFAT5     | . | NA      | NA   | NA       | NA   | synonymous SNV    | NM_173215    | exon13 | c.G3177A | p.Q1059Q |
| Tumor Subclone 2     | chr15 | 40952124  | A | G | TTBK2     | . | NA      | NA   | 0.927    | 0.1  | nonsynonymous SNV | NM_173500    | exon3  | c.T194C  | p.V65A   |
| Tumor Subclone 2     | chr18 | 11871066  | C | T | GNAL      | . | NA      | NA   | 1        | 0    | nonsynonymous SNV | NM_001142339 | exon13 | c.C1078T | p.R360C  |
| Tumor Subclone 2     | chr13 | 51605934  | T | C | NEK3      | . | NA      | NA   | NA       | 0.54 | nonsynonymous SNV | NM_001146099 | exon14 | c.A1277G | p.K426R  |
| Tumor Subclone 2     | chr19 | 47519622  | G | A | TMEM145   | . | NA      | NA   | NA       | NA   | synonymous SNV    | NM_173633    | exon14 | c.G1242A | p.V414V  |
| Tumor Subclone 2     | chr12 | 54502636  | C | T | DNAJC14   | . | NA      | NA   | NA       | NA   | synonymous SNV    | NM_032364    | exon5  | c.G1782A | p.V594V  |



|                  |       |           |   |   |           |   |    |    |          |      |                   |              |        |           |          |
|------------------|-------|-----------|---|---|-----------|---|----|----|----------|------|-------------------|--------------|--------|-----------|----------|
| Tumor Subclone 2 | chr22 | 43974435  | C | T | KIAA0930  | . | NA | NA | 0.87     | 0.36 | nonsynonymous SNV | NM_015264    | exon8  | c.G1013A  | p.R338Q  |
| Tumor Subclone 3 | chr9  | 116893031 | G | A | TNC       | . | NA | NA | 1        | 0    | nonsynonymous SNV | NM_002160    | exon2  | c.C88T    | p.R30W   |
| Tumor Subclone 3 | chr11 | 116770922 | A | G | CEP164    | . | NA | NA | 0.003    | 0.02 | nonsynonymous SNV | NM_001271933 | exon21 | c.A2846G  | p.E949G  |
| Tumor Subclone 3 | chr3  | 187782498 | C | T | DNAJB11   | . | NA | NA | 0.005    | 0.16 | nonsynonymous SNV | NM_016306    | exon6  | c.C620T   | p.T207M  |
| Tumor Subclone 3 | chr13 | 102188761 | T | C | CCDC168   | . | NA | NA | NA       | NA   | nonsynonymous SNV | NM_001146197 | exon4  | c.A12287G | p.H4096R |
| Tumor Subclone 3 | chr8  | 67251997  | G | A | CRH       | . | NA | NA | NA       | NA   | synonymous SNV    | NM_000756    | exon2  | c.C270T   | p.A90A   |
| Tumor Subclone 3 | chr21 | 15261541  | C | T | NRIP1     | . | NA | NA | 0.98     | 0.08 | nonsynonymous SNV | NM_003489    | exon4  | c.G844A   | p.E282K  |
| Tumor Subclone 3 | chr11 | 6611691   | C | T | DCHS1     | . | NA | NA | 0        | 0.04 | nonsynonymous SNV | NM_003737    | exon4  | c.G2123A  | p.R708H  |
| Tumor Subclone 3 | chr19 | 56274650  | G | A | KLK14     | . | NA | NA | 0.197    | NA   | nonsynonymous SNV | NM_022046    | exon5  | c.C382T   | p.L128F  |
| Tumor Subclone 3 | chr2  | 191721139 | G | A | STAT4     | . | NA | NA | NA       | NA   | synonymous SNV    | NM_003151    | exon2  | c.C36T    | p.I121   |
| Tumor Subclone 3 | chrX  | 118487757 | G | A | SLC25A5   | . | NA | NA | 0.1      | 0    | nonsynonymous SNV | NM_001152    | exon2  | c.G217A   | p.G73S   |
| Tumor Subclone 3 | chrX  | 53449158  | G | A | SMC1A     | . | NA | NA | 1        | 0    | nonsynonymous SNV | NM_006306    | exon11 | c.C1903T  | p.R635C  |
| Tumor Subclone 3 | chr6  | 30655688  | C | T | ABCF1     | . | NA | NA | 0.471    | 0.06 | nonsynonymous SNV | NM_001025091 | exon7  | c.C491T   | p.A164V  |
| Tumor Subclone 3 | chr1  | 243596900 | C | T | KIF26B    | . | NA | NA | NA       | NA   | synonymous SNV    | NM_018012    | exon3  | c.C607T   | p.L203L  |
| Tumor Subclone 3 | chr19 | 8703036   | A | T | OR2Z1     | . | NA | NA | 0.157    | 0.44 | nonsynonymous SNV | NM_001004699 | exon1  | c.A646T   | p.T216S  |
| Tumor Subclone 3 | chr18 | 28511245  | T | C | KLHL14    | . | NA | NA | NA       | NA   | synonymous SNV    | NM_020805    | exon8  | c.A1635G  | p.K545K  |
| Tumor Subclone 3 | chr12 | 40799111  | A | C | GXYLT1    | . | NA | NA | 0.999    | 0.22 | nonsynonymous SNV | NM_173601    | exon3  | c.T444G   | p.H148Q  |
| Tumor Subclone 2 | chr16 | 31342719  | G | A | ITGAD     | . | NA | NA | 0        | 1    | nonsynonymous SNV | NM_005353    | exon27 | c.G3098A  | p.S1033N |
| Tumor Subclone 2 | chr11 | 85123211  | G | A | SYTL2     | . | NA | NA | 0.535681 | 0    | nonsynonymous SNV | NM_032943    | exon7  | c.C806T   | p.P269L  |
| Tumor Subclone 2 | chr1  | 152017273 | C | T | SLC27A3   | . | NA | NA | 0.057    | 0.17 | nonsynonymous SNV | NM_024330    | exon5  | c.C1315T  | p.R439C  |
| Tumor Subclone 2 | chr2  | 74543550  | C | G | MOGS      | . | NA | NA | 0.799    | 0.05 | nonsynonymous SNV | NM_001146158 | exon5  | c.G556C   | p.A186P  |
| Tumor Subclone 2 | chr14 | 28307391  | C | T | FOXG1     | . | NA | NA | NA       | NA   | synonymous SNV    | NM_005249    | exon1  | c.C1155T  | p.A385A  |
| Tumor Subclone 2 | chr12 | 112182630 | C | A | TPCN1     | . | NA | NA | 0.067    | NA   | nonsynonymous SNV | NM_017901    | exon3  | c.C187A   | p.P63T   |
| Tumor Subclone 2 | chr21 | 44818101  | G | A | KRTAP10-4 | . | NA | NA | 0.401049 | NA   | nonsynonymous SNV | NM_198687    | exon1  | c.G38A    | p.R13H   |
| Tumor Subclone 2 | chr14 | 23953810  | A | G | NYNRIN    | . | NA | NA | NA       | NA   | synonymous SNV    | NM_025081    | exon9  | c.A3015G  | p.R1005R |
| Tumor Subclone 2 | chr6  | 24958912  | G | A | FAM65B    | . | NA | NA | NA       | NA   | synonymous SNV    | NM_015864    | exon10 | c.C690T   | p.G230G  |
| Tumor Subclone 2 | chr17 | 45152189  | G | A | FAM117A   | . | NA | NA | NA       | NA   | synonymous SNV    | NM_030802    | exon5  | c.C640T   | p.L214L  |
| Tumor Subclone 2 | chr2  | 74289326  | T | C | MTHFD2    | . | NA | NA | 0.967    | 0.34 | nonsynonymous SNV | NM_006636    | exon4  | c.T532C   | p.W178R  |
| Tumor Subclone 2 | chr16 | 1477918   | A | G | PTX4      | . | NA | NA | 0.626776 | 0    | nonsynonymous SNV | NM_001013658 | exon2  | c.T181C   | p.Y61H   |
| Tumor Subclone 3 | chr9  | 131670394 | T | C | USP20     | . | NA | NA | 0.51     | 0.38 | nonsynonymous SNV | NM_001008563 | exon11 | c.T980C   | p.M327T  |
| Tumor Subclone 3 | chr17 | 8079202   | G | A | CTC1      | . | NA | NA | 0.005    | 0.16 | nonsynonymous SNV | NM_025099    | exon8  | c.C1333T  | p.R445C  |
| Tumor Subclone 3 | chr3  | 52373976  | G | A | DNAH1     | . | NA | NA | NA       | NA   | nonsynonymous SNV | NM_015512    | exon34 | c.G5419A  | p.D1807N |
| Tumor Subclone 3 | chr2  | 176744810 | G | A | HOXD3     | . | NA | NA | NA       | NA   | synonymous SNV    | NM_006898    | exon3  | c.G861A   | p.P287P  |
| Tumor Subclone 3 | chr19 | 6446473   | G | A | TUBB4A    | . | NA | NA | 0.998    | 0    | nonsynonymous SNV | NM_006087    | exon4  | c.C1037T  | p.P346L  |
| Tumor Subclone 3 | chr7  | 15692143  | C | T | MEOX2     | . | NA | NA | 0        | 0.48 | nonsynonymous SNV | NM_005924    | exon1  | c.G410A   | p.S137N  |
| Tumor Subclone 3 | chrX  | 46318834  | G | A | CHST7     | . | NA | NA | 0.995    | 0    | nonsynonymous SNV | NM_019886    | exon1  | c.G524A   | p.G175E  |
| Tumor Subclone 3 | chr8  | 48802367  | C | T | KIAA0146  | . | NA | NA | NA       | NA   | synonymous SNV    | NM_001080394 | exon17 | c.C2394T  | p.D798D  |
| Tumor Subclone 3 | chr5  | 159276967 | G | A | ADRA1B    | . | NA | NA | NA       | NA   | synonymous SNV    | NM_000679    | exon1  | c.G477A   | p.R159R  |
| Tumor Subclone 1 | chr19 | 9385043   | A | G | ZNF266    | . | NA | NA | 0.998    | 0    | nonsynonymous SNV | NM_006631    | exon11 | c.T1558C  | p.Y520H  |
| Tumor Subclone 1 | chr19 | 16180883  | G | A | AP1M1     | . | NA | NA | NA       | NA   | synonymous SNV    | NM_001130524 | exon5  | c.G441A   | p.P147P  |
| Tumor Subclone 1 | chr19 | 56964284  | T | C | FPR2      | . | NA | NA | NA       | NA   | synonymous SNV    | NM_001462    | exon2  | c.T561C   | p.P187P  |
| Tumor Subclone 1 | chr19 | 59412890  | T | C | LILRB3    | . | NA | NA | 0.986    | 0    | nonsynonymous SNV | NM_006864    | exon13 | c.A1780G  | p.T594A  |
| Tumor Subclone 1 | chrX  | 27676337  | T | C | DCAF8L2   | . | NA | NA | NA       | NA   | synonymous SNV    | NM_001136533 | exon1  | c.T1404C  | p.N468N  |
| Tumor Subclone 1 | chr7  | 100321976 | C | T | SRRT      | . | NA | NA | 0.973    | 0.09 | nonsynonymous SNV | NM_001128852 | exon13 | c.C1628T  | p.T543M  |
| Tumor Subclone 1 | chr20 | 54379078  | A | G | AURKA     | . | NA | NA | 0.915    | 0    | nonsynonymous SNV | NM_198436    | exon9  | c.T899C   | p.M300T  |
| Tumor Subclone 1 | chr9  | 136857541 | A | G | COL5A1    | . | NA | NA | NA       | NA   | synonymous SNV    | NM_000093    | exon63 | c.A5037G  | p.T1679T |
| Tumor Subclone 1 | chr1  | 166332960 | T | G | GPR161    | . | NA | NA | 0.993    | 0.32 | nonsynonymous SNV | NM_001267614 | exon2  | c.A167C   | p.E56A   |
| Tumor Subclone 1 | chr6  | 51720711  | G | A | PKHD1     | . | NA | NA | 0.999    | 0.49 | nonsynonymous SNV | NM_170724    | exon58 | c.C9662T  | p.P3221L |
| Tumor Subclone 1 | chr11 | 123106521 | T | C | KNF202    | . | NA | NA | 0.977    | 0.04 | nonsynonymous SNV | NM_003455    | exon4  | c.A286G   | p.T96A   |
| Tumor Subclone 1 | chr5  | 16808008  | G | A | MYO10     | . | NA | NA | NA       | NA   | nonsynonymous SNV | NM_012334    | exon19 | c.C1858T  | p.H620Y  |
| Tumor Subclone 1 | chr1  | 157013254 | A | G | OR6N2     | . | NA | NA | 0.999    | 0.01 | nonsynonymous SNV | NM_001005278 | exon1  | c.T796C   | p.Y266H  |
| Tumor Subclone 1 | chr19 | 42881708  | A | C | ZNF607    | . | NA | NA | 0.404    | 0    | nonsynonymous SNV | NM_032689    | exon5  | c.T1164G  | p.S388R  |
| Tumor Subclone 1 | chr11 | 62046756  | T | G | AHNAK     | . | NA | NA | 0.001    | 0.02 | nonsynonymous SNV | NM_001620    | exon5  | c.A11709C | p.Q3903H |
| Tumor Subclone 1 | chr14 | 23711815  | A | G | REC8      | . | NA | NA | 0.825    | 0.08 | nonsynonymous SNV | NM_005132    | exon3  | c.A110G   | p.N37S   |
| Tumor Subclone 1 | chr8  | 110371310 | A | G | NUDCD1    | . | NA | NA | NA       | NA   | synonymous SNV    | NM_032869    | exon5  | c.T669C   | p.R223R  |
| Tumor Subclone 1 | chr11 | 62277035  | A | T | ZBTB3     | . | NA | NA | NA       | NA   | synonymous SNV    | NM_024784    | exon2  | c.T828A   | p.T276T  |

|                  |       |           |   |   |          |   |       |      |          |      |                   |              |        |           |          |
|------------------|-------|-----------|---|---|----------|---|-------|------|----------|------|-------------------|--------------|--------|-----------|----------|
| Tumor Subclone 1 | chr19 | 57408039  | C | T | PPP2R1A  | . | NA    | NA   | 0.211    | 0.13 | nonsynonymous SNV | NM_014225    | exon6  | c.C671T   | p.A224V  |
| Tumor Subclone 1 | chr19 | 43801800  | A | G | EIF3K    | . | p.18V | NA   | 0.536    | 0    | nonsynonymous SNV | NM_013234    | exon1  | c.A52G    | p.I18V   |
| Tumor Subclone 1 | chr6  | 26343033  | T | C | HIST1H1D | . | NA    | NA   | NA       | NA   | synonymous SNV    | NM_005320    | exon1  | c.A108G   | p.A36A   |
| Tumor Subclone 1 | chr11 | 67515634  | A | G | UNKNOWN  | . | NA    | NA   | NA       | 0    | unknown           |              |        |           |          |
| Tumor Subclone 1 | chr12 | 78713621  | A | G | PPP1R12A | . | NA    | NA   | NA       | NA   | synonymous SNV    | NM_001143886 | exon18 | c.T2250C  | p.P750P  |
| Tumor Subclone 1 | chr19 | 22155111  | A | G | ZNF676   | . | NA    | NA   | NA       | NA   | synonymous SNV    | NM_001001411 | exon3  | c.T1248C  | p.T416T  |
| Tumor Subclone 1 | chr11 | 76617918  | T | G | GDPD4    | . | NA    | NA   | 0.004    | 0.42 | nonsynonymous SNV | NM_182833    | exon14 | c.A1397C  | p.K466T  |
| Tumor Subclone 1 | chr7  | 20410807  | A | G | ITGB8    | . | NA    | NA   | NA       | NA   | synonymous SNV    | NM_002214    | exon11 | c.A1719G  | p.Q573Q  |
| Tumor Subclone 1 | chr5  | 150703334 | G | A | SLC36A2  | . | NA    | NA   | NA       | NA   | synonymous SNV    | NM_181776    | exon3  | c.C274T   | p.L92L   |
| Tumor Subclone 1 | chr2  | 99354567  | T | G | EIF5B    | . | NA    | NA   | NA       | NA   | synonymous SNV    | NM_015904    | exon9  | c.T1494G  | p.T498T  |
| Tumor Subclone 1 | chr14 | 63678518  | A | G | SYNE2    | . | NA    | NA   | 0.004    | 0.04 | nonsynonymous SNV | NM_015180    | exon82 | c.A15265G | p.S5089G |
| Tumor Subclone 1 | chr20 | 18091384  | G | A | CSRP2BP  | . | NA    | NA   | 0.997    | 0.01 | nonsynonymous SNV | NM_020536    | exon6  | c.G1466A  | p.R489Q  |
| Tumor Subclone 1 | chr19 | 39524671  | C | A | KIAA0355 | . | NA    | NA   | NA       | NA   | synonymous SNV    | NM_014686    | exon10 | c.C1992A  | p.G664G  |
| Tumor Subclone 1 | chr1  | 168381957 | A | G | METTL11B | . | NA    | NA   | NA       | 0.56 | nonsynonymous SNV | NM_001136107 | exon1  | c.A85G    | p.I29V   |
| Tumor Subclone 1 | chr14 | 93464706  | T | C | FAM181A  | . | NA    | NA   | 0.941    | 0.15 | nonsynonymous SNV | NM_001207074 | exon2  | c.T322C   | p.C108R  |
| Tumor Subclone 1 | chr8  | 88955052  | T | C | DCAF4L2  | . | NA    | NA   | NA       | NA   | synonymous SNV    | NM_152418    | exon1  | c.A264G   | p.T88T   |
| Tumor Subclone 1 | chr6  | 33050317  | G | C | BRD2     | . | NA    | NA   | 0.78105  | 0.01 | nonsynonymous SNV | NM_005104    | exon3  | c.G130C   | p.E44Q   |
| Tumor Subclone 1 | chr1  | 205934663 | A | G | CR1L     | . | NA    | NA   | NA       | 0.82 | nonsynonymous SNV | NM_175710    | exon5  | c.A806G   | p.H269R  |
| Tumor Subclone 1 | chr7  | 2284378   | C | T | SNX8     | . | NA    | NA   | NA       | NA   | synonymous SNV    | NM_013321    | exon2  | c.G183A   | p.P61P   |
| Tumor Subclone 1 | chr20 | 36789658  | G | A | SLC32A1  | . | NA    | NA   | NA       | NA   | synonymous SNV    | NM_080552    | exon2  | c.G540A   | p.V180V  |
| Tumor Subclone 1 | chr1  | 87141693  | T | C | UNKNOWN  | . | NA    | NA   | NA       | NA   | unknown           |              |        |           |          |
| Tumor Subclone 1 | chr2  | 201040306 | T | C | SPATS2L  | . | NA    | NA   | NA       | 0.07 | nonsynonymous SNV | NM_015535    | exon10 | c.T896C   | p.L299P  |
| Tumor Subclone 1 | chr14 | 93129862  | A | G | UNC79    | . | NA    | NA   | 0.998    | 0.35 | nonsynonymous SNV | NM_020818    | exon23 | c.A2585G  | p.H862R  |
| Tumor Subclone 1 | chr1  | 149203452 | A | G | SETDB1   | . | NA    | NA   | NA       | NA   | synonymous SNV    | NM_001145415 | exon22 | c.A3864G  | p.G1288G |
| Tumor Subclone 1 | chr5  | 7743911   | T | A | ADCY2    | . | NA    | NA   | 0.979    | NA   | nonsynonymous SNV | NM_020546    | exon5  | c.T828A   | p.N276K  |
| Tumor Subclone 1 | chr19 | 9223072   | A | C | OR7E24   | . | NA    | NA   | NA       | 0    | nonsynonymous SNV | NM_001079935 | exon1  | c.A353C   | p.Q118P  |
| Tumor Subclone 1 | chrX  | 9581713   | A | G | TBL1X    | . | NA    | NA   | NA       | NA   | synonymous SNV    | NM_001139466 | exon4  | c.A87G    | p.Q29Q   |
| Tumor Subclone 1 | chr1  | 151000008 | A | G | KPRP     | . | NA    | NA   | NA       | NA   | synonymous SNV    | NM_001025231 | exon2  | c.A1320G  | p.L440L  |
| Tumor Subclone 1 | chr19 | 60193821  | A | T | NLRP2    | . | NA    | NA   | 0.512    | 0.02 | nonsynonymous SNV | NM_001174083 | exon11 | c.A2608T  | p.R870W  |
| Tumor Subclone 1 | chr2  | 241097450 | A | G | ANKMY1   | . | NA    | NA   | NA       | NA   | synonymous SNV    | NM_016552    | exon11 | c.T2115C  | p.S705S  |
| Tumor Subclone 1 | chr18 | 59457439  | A | G | SERPIN4  | . | NA    | NA   | 0.720997 | 0    | nonsynonymous SNV | NM_002974    | exon7  | c.T728C   | p.M243T  |
| Tumor Subclone 1 | chr6  | 132901910 | T | C | UNKNOWN  | . | NA    | NA   | NA       | NA   | unknown           |              |        |           |          |
| Tumor Subclone 1 | chr6  | 152374609 | T | C | ESR1     | . | NA    | ESR1 | NA       | NA   | synonymous SNV    | NM_001122740 | exon6  | c.T1222C  | p.L408L  |
| Tumor Subclone 1 | chr17 | 16038550  | T | G | NCOR1    | . | NA    | NA   | 0.999    | 0.08 | nonsynonymous SNV | NM_001190440 | exon1  | c.A59C    | p.Y20S   |
| Tumor Subclone 1 | chr17 | 32586770  | T | C | ACACA    | . | NA    | NA   | 0.838    | 0.33 | nonsynonymous SNV | NM_198834    | exon43 | c.A5395G  | p.S1799G |
| Tumor Subclone 1 | chr14 | 80372417  | T | C | CEP128   | . | NA    | NA   | NA       | NA   | synonymous SNV    | NM_152446    | exon11 | c.A942G   | p.T314T  |
| Tumor Subclone 1 | chr8  | 70748004  | A | G | SLC05A1  | . | NA    | NA   | 0.999    | 0.16 | nonsynonymous SNV | NM_030958    | exon10 | c.T2201C  | p.F734S  |

Supplementary Table ST4.2 Somatic Mutations Detected in Bladder Cancer

| Classification   | Chromosome | Coordinate | Ref | Var | Gene Name | dbSNP ID  | Cosmic | CancerGene | POLY     | SIFT | Types             | Gene ID      | Exon   | Nucleotide | Amino Acid |
|------------------|------------|------------|-----|-----|-----------|-----------|--------|------------|----------|------|-------------------|--------------|--------|------------|------------|
| Clonal           | chr19      | 60023121   | G   | A   | KIR3DL1   | .         | NA     | NA         | 0.178079 | 0.58 | nonsynonymous SNV | NM_013289    | exon4  | c.G497A    | p.R166H    |
| Clonal           | chr10      | 104856368  | G   | C   | NT5C2     | .         | NA     | NA         | NA       | NA   | synonymous SNV    | NM_001134373 | exon4  | c.C261G    | p.L87L     |
| Clonal           | chr5       | 156412146  | C   | T   | HAVCR1    | .         | NA     | NA         | NA       | NA   | synonymous SNV    | NM_001099414 | exon4  | c.G477A    | p.T159T    |
| Clonal           | chr10      | 88669050   | C   | T   | BMPR1A    | .         | NA     | BMPR1A     | 1        | 0    | nonsynonymous SNV | NM_004329    | exon10 | c.C1010T   | p.S337L    |
| Clonal           | chr7       | 117054876  | C   | T   | CFTR      | .         | NA     | NA         | 0        | 0.09 | nonsynonymous SNV | NM_000492    | exon22 | c.C3533T   | p.S1178L   |
| Clonal           | chr4       | 39183676   | C   | G   | UGDH      | .         | NA     | NA         | 0.413    | 0    | nonsynonymous SNV | NM_003359    | exon8  | c.G994C    | p.A332P    |
| Clonal           | chr4       | 39183688   | C   | A   | UGDH      | .         | NA     | NA         | 0.107    | 0    | nonsynonymous SNV | NM_003359    | exon8  | c.G982T    | p.D328Y    |
| Clonal           | chr1       | 110102794  | C   | T   | EPS8L3    | .         | NA     | NA         | 0        | 0.58 | nonsynonymous SNV | NM_133181    | exon7  | c.G476A    | p.G159D    |
| Clonal           | chr1       | 12842174   | T   | C   | PRAMEF2   | .         | NA     | NA         | NA       | NA   | synonymous SNV    | NM_023014    | exon3  | c.T327C    | p.D109D    |
| Clonal           | chr2       | 197973698  | C   | T   | SF3B1     | .         | NA     | NA         | 0.852    | 0.03 | nonsynonymous SNV | NM_012433    | exon18 | c.G2704A   | p.E902K    |
| Clonal           | chr12      | 53706824   | C   | T   | NEUROD4   | .         | NA     | NA         | 0.721691 | 0    | stopgain SNV      | NM_021191    | exon2  | c.C334T    | p.R112X    |
| Clonal           | chr8       | 52895673   | C   | T   | PCMTD1    | .         | NA     | NA         | 0.026    | 0.1  | nonsynonymous SNV | NM_052937    | exon6  | c.G865A    | p.V289I    |
| Clonal           | chr4       | 164612757  | G   | A   | TKTL2     | .         | NA     | NA         | 0.418    | 0.02 | nonsynonymous SNV | NM_032136    | exon1  | c.C1580T   | p.S527F    |
| Clonal           | chr11      | 123994416  | G   | T   | PANX3     | .         | NA     | NA         | 0.999    | 0.18 | nonsynonymous SNV | NM_052959    | exon4  | c.G554T    | p.R185L    |
| Clonal           | chr19      | 12815346   | G   | A   | MAST1     | .         | NA     | NA         | NA       | NA   | synonymous SNV    | NM_014975    | exon4  | c.G252A    | p.A84A     |
| Clonal           | chr3       | 130638090  | C   | G   | MBD4      | .         | NA     | NA         | 0.502    | 0.07 | nonsynonymous SNV | NM_001276271 | exon3  | c.G1087C   | p.E363Q    |
| Clonal           | chr20      | 6013772    | C   | A   | FERMT1    | .         | NA     | NA         | 0.994    | 0.01 | nonsynonymous SNV | NM_017671    | exon12 | c.G1534T   | p.D512Y    |
| Clonal           | chr12      | 6925289    | G   | T   | C12orf57  | .         | NA     | NA         | NA       | NA   | synonymous SNV    | NM_138425    | exon3  | c.G324T    | p.P108P    |
| Clonal           | chr1       | 109279013  | G   | A   | CLCC1     | .         | NA     | NA         | NA       | NA   | synonymous SNV    | NM_015127    | exon11 | c.C1308T   | p.S436S    |
| Clonal           | chr18      | 17599869   | G   | T   | MIB1      | .         | NA     | NA         | 0.999    | 0.4  | nonsynonymous SNV | NM_020774    | exon2  | c.G368T    | p.R123L    |
| Clonal           | chr3       | 120933910  | T   | A   | MAATS1    | .         | NA     | NA         | 0.427    | 0.08 | nonsynonymous SNV | NM_033364    | exon9  | c.T1098A   | p.D366E    |
| Clonal           | chr10      | 72206982   | T   | C   | TBATA     | .         | NA     | NA         | 0.002    | 0.3  | nonsynonymous SNV | NM_152710    | exon7  | c.A623G    | p.Q208R    |
| Clonal           | chr9       | 39168337   | C   | G   | CNTNAP3   | .         | NA     | NA         | 0.992    | 0    | nonsynonymous SNV | NM_033655    | exon5  | c.G559C    | p.D187H    |
| Clonal           | chr2       | 112864063  | G   | A   | RGPD8     | .         | NA     | NA         | NA       | NA   | nonsynonymous SNV | NM_001164463 | exon20 | c.C2930T   | p.S977L    |
| Clonal           | chrX       | 70386653   | G   | C   | ZMYM3     | .         | NA     | NA         | 0.588    | 0.02 | nonsynonymous SNV | NM_001171163 | exon6  | c.C1199G   | p.S400C    |
| Clonal           | chr20      | 39467262   | G   | A   | CHD6      | .         | NA     | NA         | NA       | NA   | synonymous SNV    | NM_032221    | exon37 | c.C7533T   | p.V2511V   |
| Clonal           | chr3       | 52786731   | C   | T   | ITIH1     | .         | NA     | NA         | NA       | NA   | synonymous SNV    | NM_002215    | exon1  | c.C60T     | p.L20L     |
| Clonal           | chr5       | 133354731  | G   | C   | VDAC1     | .         | NA     | NA         | 0.735514 | 0.01 | stopgain SNV      | NM_003374    | exon4  | c.C131G    | p.S44X     |
| Clonal           | chr19      | 43292745   | G   | A   | SIPA1L3   | .         | NA     | NA         | NA       | NA   | synonymous SNV    | NM_015073    | exon8  | c.G2172A   | p.T724T    |
| Clonal           | chr8       | 105670255  | G   | A   | LRP12     | .         | NA     | NA         | 0.01     | 0.07 | nonsynonymous SNV | NM_013437    | exon1  | c.C47T     | p.A16V     |
| Clonal           | chr14      | 59020707   | C   | A   | L3HYPDH   | .         | NA     | NA         | NA       | NA   | synonymous SNV    | NM_144581    | exon1  | c.G81T     | p.T27T     |
| Clonal           | chr19      | 4495381    | G   | A   | SEMA6B    | .         | NA     | NA         | NA       | NA   | synonymous SNV    | NM_032108    | exon17 | c.C1899T   | p.R633R    |
| Clonal           | chr17      | 30704820   | C   | A   | SLFN11    | .         | NA     | NA         | 0.556597 | 0.09 | stopgain SNV      | NM_001104588 | exon6  | c.C1570T   | p.E524X    |
| Clonal           | chr8       | 134325811  | G   | T   | NDRG1     | .         | NA     | NA         | 0.196    | 0    | nonsynonymous SNV | NM_001258432 | exon12 | c.C662A    | p.A221E    |
| Clonal           | chr8       | 144991915  | C   | A   | NRBP2     | .         | NA     | NA         | 0.734689 | NA   | stopgain SNV      | NM_178564    | exon11 | c.G841T    | p.E281X    |
| Clonal           | chr4       | 1773366    | C   | G   | FGFR3     | 8_S249del | NA     | FGFR3      | 0.522    | 0.01 | nonsynonymous SNV | NM_022965    | exon7  | c.C746G    | p.S249C    |
| Clonal           | chr4       | 2611320    | G   | C   | FAM193A   | .         | NA     | NA         | 0.015    | 0.03 | nonsynonymous SNV | NM_003704    | exon4  | c.G226C    | p.E76Q     |
| Clonal           | chrX       | 55119822   | A   | C   | PAGE2B    | .         | NA     | NA         | NA       | NA   | synonymous SNV    | NM_001015038 | exon3  | c.A180C    | p.A60A     |
| Clonal           | chr19      | 21285269   | C   | T   | ZNF708    | .         | NA     | NA         | 0.958    | 0.06 | nonsynonymous SNV | NM_021269    | exon2  | c.G4A      | p.G2R      |
| Clonal           | chr17      | 70720800   | C   | T   | NUP85     | .         | NA     | NA         | NA       | NA   | synonymous SNV    | NM_024844    | exon5  | c.C396T    | p.F132F    |
| Tumor Subclone 1 | chr9       | 15459955   | C   | T   | PSIP1     | .         | NA     | NA         | NA       | NA   | synonymous SNV    | NM_033222    | exon11 | c.G1014A   | p.K338K    |
| Tumor Subclone 1 | chrX       | 65331711   | C   | T   | HEPH      | .         | NA     | NA         | NA       | NA   | synonymous SNV    | NM_138737    | exon9  | c.C1578T   | p.F526F    |
| Tumor Subclone 1 | chr3       | 44738927   | G   | C   | ZNF502    | .         | NA     | NA         | 0.745    | 0.06 | nonsynonymous SNV | NM_001134440 | exon4  | c.G1614C   | p.Q538H    |
| Tumor Subclone 1 | chr3       | 44738567   | G   | C   | ZNF502    | .         | NA     | NA         | 0.003    | 0.52 | nonsynonymous SNV | NM_001134440 | exon4  | c.G1254C   | p.Q418H    |
| Tumor Subclone 1 | chr5       | 180099203  | C   | G   | OR2Y1     | .         | NA     | NA         | NA       | NA   | synonymous SNV    | NM_001001657 | exon1  | c.G462C    | p.V154V    |
| Tumor Subclone 1 | chr9       | 114376732  | C   | T   | KIAA1958  | .         | NA     | NA         | 0.84     | 0    | nonsynonymous SNV | NM_133465    | exon2  | c.C551T    | p.S184L    |
| Tumor Subclone 1 | chr9       | 114376902  | C   | T   | KIAA1958  | .         | NA     | NA         | 0.902    | 0.05 | nonsynonymous SNV | NM_133465    | exon2  | c.C721T    | p.H241Y    |
| Tumor Subclone 1 | chr16      | 66713912   | C   | T   | NFATC3    | .         | NA     | NA         | NA       | NA   | synonymous SNV    | NM_004555    | exon2  | c.C625T    | p.L209L    |
| Tumor Subclone 1 | chr2       | 24047657   | G   | A   | UBXN2A    | .         | NA     | NA         | 0.018    | 0.44 | nonsynonymous SNV | NM_181713    | exon3  | c.G49A     | p.E17K     |
| Tumor Subclone 1 | chr15      | 38108932   | G   | A   | EIF2AK4   | .         | NA     | NA         | NA       | NA   | synonymous SNV    | NM_001013703 | exon34 | c.G4536A   | p.L1512L   |
| Tumor Subclone 1 | chr16      | 66714069   | C   | G   | NFATC3    | .         | NA     | NA         | 0.735352 | 0.02 | stopgain SNV      | NM_004555    | exon2  | c.C782G    | p.S261X    |
| Tumor Subclone 1 | chr1       | 225219372  | G   | A   | ADCK3     | .         | NA     | NA         | 0.011    | 0.03 | nonsynonymous SNV | NM_020247    | exon3  | c.G226A    | p.E76K     |

|                  |       |           |   |   |              |   |    |       |          |      |                   |              |        |           |          |
|------------------|-------|-----------|---|---|--------------|---|----|-------|----------|------|-------------------|--------------|--------|-----------|----------|
| Tumor Subclone 1 | chr6  | 38891314  | G | C | DNAH8        | . | NA | NA    | NA       | NA   | synonymous SNV    | NM_001206927 | exon26 | c.G3426C  | p.G1142G |
| Tumor Subclone 1 | chr1  | 7756132   | C | T | VAMP3        | . | NA | NA    | 0.735397 | 0.01 | stopgain SNV      | NM_004781    | exon2  | c.C46T    | p.Q16X   |
| Tumor Subclone 1 | chr20 | 2584261   | G | C | NOP56        | . | NA | NA    | 0.998    | 0    | nonsynonymous SNV | NM_006392    | exon7  | c.G778C   | p.D260H  |
| Tumor Subclone 1 | chr1  | 47173844  | C | G | CYP4A11      | . | NA | NA    | 0.786    | 0.03 | nonsynonymous SNV | NM_000778    | exon5  | c.G573C   | p.L191F  |
| Tumor Subclone 1 | chr6  | 159098329 | C | G | SYTL3        | . | NA | NA    | 0.006    | 0.04 | nonsynonymous SNV | NM_001242395 | exon12 | c.C1032G  | p.I344M  |
| Tumor Subclone 1 | chr5  | 10455546  | C | G | MARCH6       | . | NA | NA    | NA       | NA   | synonymous SNV    | NM_001270660 | exon12 | c.C960G   | p.V320V  |
| Tumor Subclone 1 | chr17 | 64499978  | G | C | ABCA9        | . | NA | NA    | 0        | 0.84 | nonsynonymous SNV | NM_080283    | exon28 | c.C3649G  | p.L1217V |
| Tumor Subclone 1 | chr22 | 38043570  | C | G | RPL3         | . | NA | NA    | 0.982    | 0.05 | nonsynonymous SNV | NM_000967    | exon3  | c.G207C   | p.K69N   |
| Tumor Subclone 1 | chr5  | 55004159  | C | G | SLC38A9      | . | NA | NA    | 0.841    | 0.08 | nonsynonymous SNV | NM_173514    | exon4  | c.G235C   | p.D79H   |
| Tumor Subclone 1 | chr13 | 23919323  | A | G | PARP4        | . | NA | NA    | 0.941    | 0.01 | nonsynonymous SNV | NM_006437    | exon26 | c.T3116C  | p.I1039T |
| Tumor Subclone 1 | chr11 | 47600865  | C | A | MTCH2        | . | NA | NA    | NA       | NA   | synonymous SNV    | NM_014342    | exon12 | c.G789T   | p.T263T  |
| Tumor Subclone 1 | chr7  | 64025809  | A | G | ZNF273       | . | NA | NA    | 0.116    | 0.3  | nonsynonymous SNV | NM_021148    | exon4  | c.A668G   | p.Q223R  |
| Tumor Subclone 1 | chr16 | 22453366  | G | C | LOC100132247 | . | NA | NA    | NA       | NA   | nonsynonymous SNV | NM_001135865 | exon7  | c.G1561C  | p.A521P  |
| Tumor Subclone 1 | chr2  | 202053133 | G | T | STRADB       | . | NA | NA    | 0.999    | 0    | nonsynonymous SNV | NM_018571    | exon12 | c.G1247T  | p.W416L  |
| Tumor Subclone 1 | chrX  | 99549746  | G | A | PCDH19       | . | NA | NA    | 0.768    | 0    | nonsynonymous SNV | NM_001105243 | exon1  | c.C506T   | p.T169M  |
| Tumor Subclone 1 | chr19 | 45060359  | G | A | FCGBP        | . | NA | NA    | 0.999    | 0.21 | nonsynonymous SNV | NM_003890    | exon28 | c.C12829T | p.P4277S |
| Tumor Subclone 1 | chr4  | 100761370 | C | G | MTTP         | . | NA | NA    | 0.95     | 0    | nonsynonymous SNV | NM_000253    | exon18 | c.C2472G  | p.F824L  |
| Tumor Subclone 1 | chr6  | 31430894  | G | C | HLA-B        | . | NA | NA    | NA       | NA   | synonymous SNV    | NM_005514    | exon5  | c.C981G   | p.V327V  |
| Tumor Subclone 1 | chr12 | 11065759  | C | G | TAS2R19      | . | NA | NA    | 0.616    | NA   | nonsynonymous SNV | NM_176888    | exon1  | c.G679C   | p.A227P  |
| Tumor Subclone 2 | chr4  | 119850753 | G | C | METTL14      | . | NA | NA    | 0.732961 | 0.1  | nonsynonymous SNV | NM_020961    | exon11 | c.G1219C  | p.D407H  |
| Tumor Subclone 2 | chr1  | 152241066 | G | C | NUP210L      | . | NA | NA    | 0.937    | 0.31 | nonsynonymous SNV | NM_207308    | exon36 | c.C4950G  | p.I1650M |
| Tumor Subclone 2 | chr8  | 39066802  | C | T | ADAM9        | . | NA | NA    | NA       | NA   | synonymous SNV    | NM_003816    | exon19 | c.C2148T  | p.I716I  |
| Tumor Subclone 2 | chr16 | 30501393  | C | G | ZNF785       | . | NA | NA    | 0.903    | 0    | nonsynonymous SNV | NM_152458    | exon3  | c.G1207C  | p.E403Q  |
| Tumor Subclone 2 | chr4  | 14643885  | C | T | CPEB2        | . | NA | NA    | 0.735404 | 0    | stopgain SNV      | NM_182485    | exon5  | c.C2128T  | p.R710X  |
| Tumor Subclone 2 | chr2  | 219032824 | C | T | USP37        | . | NA | NA    | 0.907    | 0.21 | nonsynonymous SNV | NM_020935    | exon23 | c.G2576A  | p.G859E  |
| Tumor Subclone 2 | chr8  | 7205184   | G | A | ZNF705G      | . | NA | NA    | NA       | NA   | stopgain SNV      | NM_001164457 | exon3  | c.C220T   | p.Q74X   |
| Tumor Subclone 2 | chr16 | 3307869   | G | A | ZNF75A       | . | NA | NA    | NA       | NA   | synonymous SNV    | NM_153028    | exon6  | c.G890A   | p.X297X  |
| Tumor Subclone 2 | chr11 | 107611693 | G | C | ATM          | . | NA | ATM   | 0.999    | 0    | nonsynonymous SNV | NM_000051    | exon5  | c.G418C   | p.D140H  |
| Tumor Subclone 2 | chr17 | 39831667  | C | G | GPATCH8      | . | NA | NA    | 0.813    | 0.18 | nonsynonymous SNV | NM_001002909 | exon8  | c.G3304C  | p.V1102L |
| Tumor Subclone 2 | chr5  | 154256030 | C | G | GEMIN5       | . | NA | NA    | 0.061    | 0.16 | nonsynonymous SNV | NM_015465    | exon24 | c.G3412C  | p.E1138Q |
| Tumor Subclone 2 | chr1  | 12778431  | G | A | PRAMEF1      | . | NA | NA    | 0.006    | 1    | nonsynonymous SNV | NM_023013    | exon4  | c.G1124A  | p.R375Q  |
| Tumor Subclone 3 | chr16 | 23553821  | C | G | PALB2        | . | NA | PALB2 | 0.998    | 0.07 | nonsynonymous SNV | NM_024675    | exon4  | c.G1547C  | p.R516T  |
| Tumor Subclone 3 | chr2  | 179321628 | G | C | TTN          | . | NA | NA    | 0.413091 | NA   | nonsynonymous SNV | NM_133379    | exon46 | c.C13744G | p.Q4582E |
| Tumor Subclone 3 | chr17 | 23878491  | G | A | FOXN1        | . | NA | NA    | NA       | NA   | synonymous SNV    | NM_003593    | exon3  | c.G684A   | p.Q228Q  |
| Tumor Subclone 3 | chr2  | 231047372 | C | T | SP100        | . | NA | NA    | NA       | NA   | synonymous SNV    | NM_001080391 | exon17 | c.C1566T  | p.N522N  |
| Tumor Subclone 3 | chr17 | 71136789  | C | T | RECQL5       | . | NA | NA    | 0        | 1    | nonsynonymous SNV | NM_004259    | exon16 | c.G2309A  | p.R770Q  |
| Tumor Subclone 3 | chr9  | 115171866 | G | A | BSPRY        | . | NA | NA    | 0        | 0.56 | nonsynonymous SNV | NM_017688    | exon6  | c.G832A   | p.A278T  |
| Tumor Subclone 3 | chr15 | 32183389  | C | T | PGBD4        | . | NA | NA    | NA       | NA   | synonymous SNV    | NM_152595    | exon1  | c.C1365T  | p.F455F  |
| Tumor Subclone 3 | chr7  | 72789510  | C | T | ABHD11       | . | NA | NA    | 0.011    | 0.55 | nonsynonymous SNV | NM_148912    | exon4  | c.G610A   | p.E204K  |
| Tumor Subclone 3 | chr6  | 154777212 | C | T | CNKSR3       | . | NA | NA    | 0.063    | 0.46 | nonsynonymous SNV | NM_173515    | exon10 | c.G983A   | p.S328N  |
| Tumor Subclone 3 | chr1  | 207945884 | C | T | HSD11B1      | . | NA | NA    | 1        | 0    | nonsynonymous SNV | NM_181755    | exon3  | c.C194T   | p.A65V   |
| Tumor Subclone 3 | chr1  | 89221226  | G | A | RBMXL1       | . | NA | NA    | 0.012    | 0.44 | nonsynonymous SNV | NM_019610    | exon2  | c.C872T   | p.S291L  |

Supplementary Table ST4.3 Somatic Mutations Detected in ALL

| Classification     | Chromosome | Coordinate | Ref | Var | Gene Name | dbSNP ID | Cosmic | CancerGene | POLY     | SIFT | Types             | Gene ID      | Exon   | Nucleotide | Amino Acid |
|--------------------|------------|------------|-----|-----|-----------|----------|--------|------------|----------|------|-------------------|--------------|--------|------------|------------|
| Clonal             | chr19      | 57579730   | A   | G   | ZNF880    | .        | NA     | NA         | NA       | NA   | nonsynonymous SNV | NM_001145434 | exon4  | c.A1085G   | p.N362S    |
| Clonal             | chr9       | 131856117  | T   | G   | GPR107    | .        | NA     | NA         | 0.036    | 0.03 | nonsynonymous SNV | NM_001136558 | exon1  | c.T85G     | p.L29V     |
| Clonal             | chr9       | 21176964   | A   | T   | IFNA4     | .        | NA     | NA         | 0        | 0.52 | nonsynonymous SNV | NM_021068    | exon1  | c.T567A    | p.D189E    |
| Clonal             | chr12      | 112315276  | G   | A   | SDS       | .        | NA     | NA         | NA       | NA   | synonymous SNV    | NM_006843    | exon8  | c.C840T    | p.H280H    |
| Clonal             | chr20      | 49668729   | G   | A   | ATP9A     | .        | NA     | NA         | NA       | NA   | synonymous SNV    | NM_006045    | exon21 | c.C2229T   | p.V743Y    |
| Clonal             | chr2       | 51108665   | G   | A   | NRXN1     | .        | NA     | NA         | NA       | NA   | nonsynonymous SNV | NM_004801    | exon2  | c.C251T    | p.T84M     |
| Clonal             | chr7       | 18650918   | C   | T   | HDAC9     | .        | NA     | NA         | NA       | 0.05 | nonsynonymous SNV | NM_001204144 | exon10 | c.C997T    | p.P333S    |
| Clonal             | chr11      | 48303970   | G   | T   | OR4C3     | .        | NA     | NA         | 0.532064 | 0.01 | nonsynonymous SNV | NM_001004702 | exon1  | c.G902T    | p.G301V    |
| Clonal             | chr9       | 115398920  | G   | A   | RGS3      | .        | NA     | NA         | 0.182    | 0.33 | nonsynonymous SNV | NM_130795    | exon16 | c.G2620A   | p.V874I    |
| Subclone 1         | chrX       | 51655281   | C   | G   | MAGED1    | .        | NA     | NA         | 0.553348 | 0.05 | nonsynonymous SNV | NM_001005332 | exon3  | c.C438G    | p.F146L    |
| Subclone 1         | chr19      | 10262936   | C   | G   | ICAM5     | .        | NA     | NA         | 0.37     | 0.26 | nonsynonymous SNV | NM_003259    | exon2  | c.C271G    | p.R91G     |
| Subclone 1         | chr3       | 148613964  | C   | T   | ZIC1      | .        | NA     | NA         | 0.09     | 0.01 | nonsynonymous SNV | NM_003412    | exon3  | c.C1280T   | p.S427F    |
| Subclone 1         | chr2       | 196426356  | C   | T   | DNAH7     | .        | NA     | NA         | 0.783    | 0    | nonsynonymous SNV | NM_018897    | exon46 | c.G8737A   | p.G2913R   |
| Subclone 1         | chr4       | 159787427  | G   | A   | RXFP1     | .        | NA     | NA         | NA       | NA   | synonymous SNV    | NM_001253732 | exon17 | c.G984A    | p.V328V    |
| Subclone 1         | chr19      | 12744719   | G   | A   | HOOKE2    | .        | NA     | NA         | 0.001    | 0.11 | nonsynonymous SNV | NM_013312    | exon5  | c.C263T    | p.A88V     |
| Subclone 1         | chr11      | 1204857    | G   | A   | MUC5B     | .        | NA     | NA         | NA       | NA   | nonsynonymous SNV | NM_002458    | exon5  | c.G482A    | p.R161H    |
| Subclone 1         | chr3       | 182158387  | G   | C   | FXR1      | .        | NA     | NA         | 0.074    | 0.11 | nonsynonymous SNV | NM_001013439 | exon11 | c.G712C    | p.E238Q    |
| Subclone 2         | chr4       | 48582288   | C   | G   | OC1AD2    | .        | NA     | NA         | 0.08     | 0.47 | nonsynonymous SNV | NM_001014446 | exon7  | c.G435C    | p.E145D    |
| Subclone 2         | chr10      | 118304718  | G   | C   | PNLIP     | .        | NA     | NA         | 0.003    | 0.55 | nonsynonymous SNV | NM_000936    | exon7  | c.G610C    | p.E204Q    |
| Subclone 2         | chr1       | 245653902  | G   | C   | NLRP3     | .        | NA     | NA         | NA       | NA   | synonymous SNV    | NM_183395    | exon3  | c.G534C    | p.R178R    |
| Subclone 2         | chr19      | 57579840   | C   | G   | ZNF880    | .        | NA     | NA         | NA       | NA   | nonsynonymous SNV | NM_001145434 | exon4  | c.C1195G   | p.H399D    |
| Subclone 2         | chr4       | 4327202    | C   | T   | LYAR      | .        | NA     | NA         | 0.952    | 0.62 | nonsynonymous SNV | NM_001145725 | exon7  | c.G625A    | p.E209K    |
| Subclone 2         | chr2       | 108731916  | C   | G   | RANBP2    | .        | NA     | NA         | 0.065    | 0.06 | nonsynonymous SNV | NM_006267    | exon9  | c.C1172G   | p.S391C    |
| Subclone 2         | chr17      | 40674620   | C   | T   | FMNL1     | .        | NA     | NA         | 0.949    | 0.78 | nonsynonymous SNV | NM_005892    | exon14 | c.C1421T   | p.S474L    |
| Subclone 4         | chr2       | 51108670   | A   | G   | NRXN1     | .        | NA     | NA         | NA       | NA   | synonymous SNV    | NM_004801    | exon2  | c.T246C    | p.I82I     |
| Subclone 4         | chr17      | 10367226   | G   | A   | MYH2      | .        | NA     | NA         | 0.053    | 0.07 | nonsynonymous SNV | NM_001100112 | exon39 | c.C5579T   | p.T1860M   |
| Subclone 4         | chr17      | 7345687    | C   | G   | POLR2A    | .        | NA     | NA         | 0.04     | NA   | nonsynonymous SNV | NM_000937    | exon14 | c.C2264G   | p.S755C    |
| Subclone 4         | chrX       | 70278525   | A   | G   | MED12     | .        | NA     | NA         | 0.755449 | 0.06 | nonsynonymous SNV | NM_005120    | exon44 | c.A6476G   | p.Q2159R   |
| Subclone 4,5       | chr9       | 115398966  | T   | C   | RGS3      | .        | NA     | NA         | 0.851    | 0    | nonsynonymous SNV | NM_130795    | exon16 | c.T2666C   | p.L889P    |
| Subclones 2, 4, 5  | chr5       | 80675402   | G   | C   | ACOT12    | .        | NA     | NA         | 0.002    | 0.25 | nonsynonymous SNV | NM_130767    | exon10 | c.C1035G   | p.I345M    |
| Subclones 2, 4, 5  | chr14      | 44634345   | G   | A   | PRPF39    | .        | NA     | NA         | NA       | NA   | synonymous SNV    | NM_017922    | exon2  | c.G153A    | p.V51V     |
| Subclones 2, 4, 5  | chr19      | 42852580   | G   | C   | ZNF781    | .        | NA     | NA         | 0.787    | 0    | nonsynonymous SNV | NM_152605    | exon4  | c.C310G    | p.L104V    |
| Subclones 2, 4, 5  | chr14      | 41426224   | T   | A   | LRFN5     | .        | NA     | NA         | 0.999    | 0.03 | nonsynonymous SNV | NM_152447    | exon3  | c.T646A    | p.F216I    |
| Subclones 2, 4, 5  | chr9       | 131856058  | C   | G   | GPR107    | .        | NA     | NA         | 0.001    | 0.06 | nonsynonymous SNV | NM_001136558 | exon1  | c.C26G     | p.S9C      |
| Subclones 2, 4, 5  | chr9       | 135285000  | C   | T   | ADAMTS13  | .        | NA     | NA         | NA       | NA   | synonymous SNV    | NM_139025    | exon8  | c.C945T    | p.F315F    |
| Subclones 2, 4, 5  | chr10      | 102044827  | G   | A   | PKD2L1    | .        | NA     | NA         | 0.997    | 0    | nonsynonymous SNV | NM_001253837 | exon8  | c.C1259T   | p.S420F    |
| Subclones 2, 4, 5  | chr10      | 61616665   | C   | T   | ANK3      | .        | NA     | NA         | NA       | NA   | synonymous SNV    | NM_001204403 | exon18 | c.G1881A   | p.T627T    |
| Subclones 2, 4, 5  | chr6       | 56448938   | C   | T   | DST       | .        | NA     | NA         | NA       | 0.17 | nonsynonymous SNV | NM_015548    | exon73 | c.G13963A  | p.E4655K   |
| Multiple Subclones | chr10      | 129792276  | T   | C   | MKI67     | .        | NA     | NA         | NA       | NA   | synonymous SNV    | NM_001145966 | exon12 | c.A6738G   | p.T2246T   |
| Multiple Subclones | chr9       | 21156062   | T   | C   | IFNA21    | .        | NA     | NA         | 0.018    | 0.05 | nonsynonymous SNV | NM_002175    | exon1  | c.A550G    | p.R184G    |
| Multiple Subclones | chr9       | 135285026  | T   | C   | ADAMTS13  | .        | NA     | NA         | 0.999    | 0.01 | nonsynonymous SNV | NM_139025    | exon8  | c.T971C    | p.F324S    |
| Multiple Subclones | chr19      | 12744712   | A   | G   | HOOKE2    | .        | NA     | NA         | NA       | NA   | synonymous SNV    | NM_013312    | exon5  | c.T270C    | p.P90P     |
| Multiple Subclones | chr9       | 33788041   | T   | C   | PRSS3     | .        | NA     | NA         | 1        | 0    | nonsynonymous SNV | NM_001197098 | exon3  | c.T394C    | p.C132R    |
| Multiple Subclones | chr19      | 57579885   | G   | A   | ZNF880    | .        | NA     | NA         | NA       | NA   | nonsynonymous SNV | NM_001145434 | exon4  | c.G1240A   | p.G414S    |
| Multiple Subclones | chr19      | 10262915   | G   | A   | ICAM5     | .        | NA     | NA         | 0.008    | 0.35 | nonsynonymous SNV | NM_003259    | exon2  | c.G250A    | p.A84T     |
| Multiple Subclones | chr12      | 112315280  | C   | G   | SDS       | .        | NA     | NA         | 0.916    | 0.33 | nonsynonymous SNV | NM_006843    | exon8  | c.G836C    | p.S279T    |
| Multiple Subclones | chr10      | 102044809  | C   | T   | PKD2L1    | .        | NA     | NA         | 1        | 0    | nonsynonymous SNV | NM_001253837 | exon8  | c.G1277A   | p.C426Y    |
| Multiple Subclones | chr17      | 40674598   | C   | T   | FMNL1     | .        | NA     | NA         | 0.143    | 0.7  | nonsynonymous SNV | NM_005892    | exon14 | c.C1399T   | p.P467S    |
| Multiple Subclones | chrX       | 51655233   | G   | A   | MAGED1    | .        | NA     | NA         | NA       | NA   | synonymous SNV    | NM_001005332 | exon3  | c.G390A    | p.Q130Q    |
| Multiple Subclones | chr9       | 33788046   | C   | T   | PRSS3     | .        | NA     | NA         | NA       | NA   | synonymous SNV    | NM_001197098 | exon3  | c.C399T    | p.L133L    |
| Multiple Subclones | chr19      | 10262918   | C   | T   | ICAM5     | .        | NA     | NA         | 0.983    | 0.12 | nonsynonymous SNV | NM_003259    | exon2  | c.C253T    | p.R85W     |
| Multiple Subclones | chrX       | 46357671   | G   | A   | SLC9A7    | .        | NA     | NA         | NA       | NA   | synonymous SNV    | NM_001257291 | exon16 | c.C1926T   | p.Y642Y    |
| Multiple Subclones | chr19      | 42852573   | C   | T   | ZNF781    | .        | NA     | NA         | 0.912    | 0.85 | nonsynonymous SNV | NM_152605    | exon4  | c.G317A    | p.R106Q    |
| Multiple Subclones | chr19      | 42852557   | A   | G   | ZNF781    | .        | NA     | NA         | NA       | NA   | synonymous SNV    | NM_152605    | exon4  | c.T333C    | p.H111H    |
| Multiple Subclones | chrX       | 32473355   | G   | A   | DMD       | .        | NA     | NA         | NA       | NA   | synonymous SNV    | NM_004009    | exon17 | c.C1998T   | p.T666T    |
| Multiple Subclones | chr7       | 56141556   | C   | T   | CHCHD2    | .        | NA     | NA         | NA       | NA   | synonymous SNV    | NM_016139    | exon1  | c.G45A     | p.P15P     |
| Multiple Subclones | chr15      | 81289050   | G   | A   | WHAMM     | .        | NA     | NA         | NA       | 0.09 | nonsynonymous SNV | NM_001080435 | exon6  | c.G1415A   | p.R472Q    |

Supplementary Table ST5.1 New Mutations Detected in TNBC

| Classification | Chromosome | Coordinate | Ref | Var | Gene Name | dbSNP ID | Cosmic | CancerGene | POLY     | SIFT | Types             | Gene ID      | Exon   | Nucleotide | Amino Acid |
|----------------|------------|------------|-----|-----|-----------|----------|--------|------------|----------|------|-------------------|--------------|--------|------------|------------|
| Clonal         | chr4       | 77447102   | C   | T   | STBD1     | .        | NA     | NA         | NA       | NA   | synonymous SNV    | NM_003943    | exon1  | c.C156T    | p.G52G     |
| Clonal         | chr16      | 30701629   | C   | T   | ZNF629    | .        | NA     | NA         | NA       | NA   | synonymous SNV    | NM_001080417 | exon3  | c.G1521A   | p.T507T    |
| Clonal         | chr19      | 45232719   | A   | G   | ZNF780B   | .        | NA     | NA         | NA       | NA   | synonymous SNV    | NM_001005851 | exon5  | c.T1887C   | p.N629N    |
| Clonal         | chrX       | 106970866  | C   | T   | MID2      | .        | NA     | NA         | NA       | NA   | synonymous SNV    | NM_012216    | exon2  | c.C315T    | p.R105R    |
| Clonal         | chr14      | 72229640   | G   | C   | DPF3      | .        | NA     | NA         | NA       | NA   | synonymous SNV    | NM_012074    | exon7  | c.C639G    | p.L213L    |
| Clonal         | chr4       | 56875862   | C   | T   | KIAA1211  | .        | NA     | NA         | NA       | NA   | synonymous SNV    | NM_020722    | exon8  | c.C1437T   | p.P479P    |
| Clonal         | chr19      | 47723143   | G   | A   | CEACAM1   | .        | NA     | NA         | 0.001    | 0    | nonsynonymous SNV | NM_001712    | exon2  | c.C314T    | p.A105V    |
| Clonal         | chr3       | 184728396  | C   | T   | KLHL6     | .        | NA     | NA         | NA       | NA   | synonymous SNV    | NM_130446    | exon2  | c.G390A    | p.T130T    |
| Clonal         | chr13      | 50753147   | G   | A   | FAM124A   | .        | NA     | NA         | NA       | NA   | synonymous SNV    | NM_001242312 | exon4  | c.G1395A   | p.L465L    |
| Clonal         | chr3       | 102445981  | C   | T   | IMPG2     | .        | NA     | NA         | NA       | NA   | synonymous SNV    | NM_016247    | exon13 | c.G1884A   | p.L628L    |
| Clonal         | chr7       | 47843113   | G   | A   | PKD11     | .        | NA     | NA         | NA       | NA   | synonymous SNV    | NM_138295    | exon37 | c.C5874T   | p.T1958T   |
| Clonal         | chr3       | 64557585   | G   | A   | ADAMTS9   | .        | NA     | NA         | NA       | NA   | synonymous SNV    | NM_182920    | exon27 | c.C4140T   | p.S1380S   |
| Clonal         | chr14      | 75975794   | C   | T   | ESRRB     | .        | NA     | NA         | NA       | NA   | synonymous SNV    | NM_004452    | exon4  | c.C345T    | p.Y115Y    |
| Clonal         | chr6       | 42998906   | C   | A   | PTCRA     | .        | NA     | NA         | 0.792    | 0    | nonsynonymous SNV | NM_001243169 | exon3  | c.C147A    | p.F49L     |
| Clonal         | chr11      | 66835862   | C   | A   | SSH3      | .        | NA     | NA         | NA       | NA   | synonymous SNV    | NM_017857    | exon14 | c.C1908A   | p.S636S    |
| Clonal         | chr5       | 178961579  | C   | T   | RUFY1     | .        | NA     | NA         | NA       | NA   | synonymous SNV    | NM_025158    | exon15 | c.C1842T   | p.G614G    |
| Clonal         | chr11      | 60805108   | G   | A   | VWCE      | .        | NA     | NA         | NA       | NA   | synonymous SNV    | NM_152718    | exon8  | c.C963T    | p.P321P    |
| Clonal         | chrX       | 53241916   | C   | A   | KDM5C     | .        | NA     | NA         | NA       | NA   | synonymous SNV    | NM_004187    | exon20 | c.G3027T   | p.A1009A   |
| Clonal         | chr20      | 51632206   | C   | T   | ZNF217    | .        | NA     | NA         | NA       | NA   | synonymous SNV    | NM_006526    | exon1  | c.G567A    | p.Q189Q    |
| Clonal         | chr7       | 55527565   | C   | T   | VOPP1     | .        | NA     | NA         | NA       | NA   | nonsynonymous SNV | NM_030796    | exon4  | c.G232A    | p.G78S     |
| Clonal         | chr19      | 17953670   | C   | T   | KCNN1     | .        | NA     | NA         | NA       | NA   | synonymous SNV    | NM_002248    | exon5  | c.C651T    | p.Y217Y    |
| Clonal         | chr5       | 140187946  | G   | A   | PCDHA6    | .        | NA     | NA         | 0.559211 | 0    | nonsynonymous SNV | NM_018909    | exon1  | c.G86A     | p.G29D     |
| Clonal         | chr8       | 121306627  | T   | C   | COL14A1   | .        | NA     | NA         | NA       | NA   | synonymous SNV    | NM_021110    | exon15 | c.T1857C   | p.F619F    |
| Clonal         | chr19      | 45012991   | G   | A   | DYRK1B    | .        | NA     | NA         | 0.09     | 0.07 | nonsynonymous SNV | NM_006483    | exon4  | c.C236T    | p.S79L     |
| Clonal         | chr20      | 533252     | G   | A   | TCF15     | .        | NA     | NA         | 0.698278 | 0.02 | stopgain SNV      | NM_004609    | exon2  | c.C583T    | p.R195X    |
| Clonal         | chr19      | 12896481   | G   | A   | FARSA     | .        | NA     | NA         | NA       | NA   | synonymous SNV    | NM_004461    | exon10 | c.C1167T   | p.G389G    |
| Clonal         | chr19      | 60848088   | G   | T   | ZNF581    | .        | NA     | NA         | 0.968    | 0.01 | nonsynonymous SNV | NM_016535    | exon2  | c.G339T    | p.K113N    |
| Clonal         | chr1       | 179170880  | C   | T   | KIAA1614  | .        | NA     | NA         | NA       | NA   | synonymous SNV    | NM_020950    | exon5  | c.C1212T   | p.G404G    |
| Clonal         | chr16      | 9770251    | G   | A   | GRIN2A    | .        | NA     | NA         | NA       | NA   | synonymous SNV    | NM_001134408 | exon12 | c.C2553T   | p.G851G    |
| Clonal         | chr17      | 69836175   | G   | A   | KIF19     | .        | NA     | NA         | NA       | 0    | nonsynonymous SNV | NM_153209    | exon2  | c.G56A     | p.R19Q     |
| Clonal         | chr16      | 54080129   | G   | A   | MMP2      | .        | NA     | NA         | 0.932    | 0.25 | nonsynonymous SNV | NM_004530    | exon6  | c.G1006A   | p.A336T    |
| Clonal         | chr17      | 39992097   | G   | A   | FZD2      | .        | NA     | NA         | NA       | NA   | synonymous SNV    | NM_001466    | exon1  | c.G1515A   | p.P505P    |
| Clonal         | chr22      | 40425560   | C   | G   | MEI1      | .        | NA     | NA         | NA       | 0    | nonsynonymous SNV | NM_152513    | exon1  | c.C72G     | p.F24L     |
| Clonal         | chr10      | 100140401  | G   | A   | PYROXD2   | .        | NA     | NA         | NA       | NA   | synonymous SNV    | NM_032709    | exon12 | c.C1236T   | p.D412D    |
| Clonal         | chr16      | 56633668   | C   | T   | MMP15     | .        | NA     | NA         | NA       | NA   | synonymous SNV    | NM_002428    | exon7  | c.C1197T   | p.R399R    |
| Clonal         | chr11      | 45789078   | C   | T   | SLC35C1   | .        | NA     | NA         | NA       | NA   | synonymous SNV    | NM_001145265 | exon3  | c.C672T    | p.N224N    |
| Clonal         | chr8       | 119662258  | A   | G   | SAMD12    | .        | NA     | NA         | NA       | NA   | synonymous SNV    | NM_001101676 | exon2  | c.T69C     | p.G23G     |
| Clonal         | chr19      | 47603350   | G   | A   | LIPE      | .        | NA     | NA         | NA       | NA   | synonymous SNV    | NM_005357    | exon6  | c.C1953T   | p.H651H    |
| Clonal         | chr1       | 12809901   | C   | T   | PRAMEF11  | .        | NA     | NA         | NA       | NA   | synonymous SNV    | NM_001146344 | exon3  | c.G543A    | p.L181L    |
| Clonal         | chr4       | 38474861   | C   | A   | TLR1      | .        | NA     | NA         | 0        | 0.01 | nonsynonymous SNV | NM_003263    | exon4  | c.G1987T   | p.G663C    |
| Clonal         | chr2       | 73530918   | C   | A   | ALMS1     | .        | NA     | NA         | NA       | NA   | synonymous SNV    | NM_015120    | exon8  | c.C3753A   | p.V1251V   |
| Clonal         | chr11      | 4901738    | G   | A   | OR51G1    | .        | NA     | NA         | NA       | NA   | synonymous SNV    | NM_001005237 | exon1  | c.C408T    | p.T136T    |
| Clonal         | chr6       | 50918917   | C   | T   | TFAP2B    | .        | NA     | NA         | NA       | NA   | synonymous SNV    | NM_003221    | exon7  | c.C1236T   | p.A412A    |
| Clonal         | chr19      | 13802590   | G   | A   | ZSWIM4    | .        | NA     | NA         | 0.874    | 0.36 | nonsynonymous SNV | NM_023072    | exon13 | c.G2696A   | p.R899H    |
| Clonal         | chr13      | 97626985   | C   | T   | RNF113B   | .        | NA     | NA         | NA       | NA   | synonymous SNV    | NM_178861    | exon1  | c.G507A    | p.S169S    |
| Clonal         | chr21      | 44795059   | G   | A   | KRTAP10-2 | .        | NA     | NA         | NA       | NA   | synonymous SNV    | NM_198693    | exon1  | c.C711T    | p.P237P    |
| Clonal         | chr4       | 103737794  | C   | T   | NFKB1     | .        | NA     | NA         | NA       | NA   | synonymous SNV    | NM_001165412 | exon15 | c.C1572T   | p.D524D    |
| Clonal         | chr21      | 44795071   | G   | A   | KRTAP10-2 | .        | NA     | NA         | NA       | NA   | synonymous SNV    | NM_198693    | exon1  | c.C699T    | p.L233L    |
| Clonal         | chr5       | 161048856  | C   | T   | GABRA6    | .        | NA     | NA         | NA       | NA   | synonymous SNV    | NM_000811    | exon5  | c.C465T    | p.D155D    |
| Clonal         | chr11      | 64513555   | G   | T   | BATF2     | .        | NA     | NA         | NA       | NA   | synonymous SNV    | NM_138456    | exon3  | c.C447A    | p.L149L    |
| Clonal         | chrX       | 54486634   | C   | T   | TSR2      | .        | NA     | NA         | NA       | NA   | synonymous SNV    | NM_058163    | exon3  | c.C249T    | p.D83D     |
| Clonal         | chr15      | 62578773   | C   | G   | ZNF609    | .        | NA     | NA         | NA       | NA   | synonymous SNV    | NM_015042    | exon1  | c.C102G    | p.L34L     |

|                  |       |           |   |   |          |   |      |       |          |      |                   |              |        |           |          |
|------------------|-------|-----------|---|---|----------|---|------|-------|----------|------|-------------------|--------------|--------|-----------|----------|
| Clonal           | chr16 | 30643283  | G | A | SRCAP    | . | NA   | NA    | NA       | NA   | synonymous SNV    | NM_006662    | exon25 | c.G5037A  | p.Q1679Q |
| Clonal           | chr14 | 23975446  | T | C | KHNYN    | . | NA   | NA    | NA       | NA   | synonymous SNV    | NM_015299    | exon7  | c.T1698C  | p.F566F  |
| Clonal           | chr1  | 32276060  | C | T | KHDRBS1  | . | NA   | NA    | 0.854    | 0.01 | nonsynonymous SNV | NM_006559    | exon6  | c.C943T   | p.R315C  |
| Clonal           | chr1  | 172139794 | A | G | SERPINC1 | . | NA   | NA    | NA       | NA   | synonymous SNV    | NM_000488    | exon7  | c.T1251C  | p.S417S  |
| Clonal           | chr12 | 76939694  | G | A | NAV3     | . | NA   | NA    | NA       | NA   | synonymous SNV    | NM_014903    | exon9  | c.G1944A  | p.S648S  |
| Clonal           | chr19 | 7870931   | C | A | LRRC8E   | . | NA   | NA    | NA       | NA   | synonymous SNV    | NM_001268285 | exon2  | c.C1137A  | p.G379G  |
| Clonal           | chr1  | 20517689  | T | C | VWA5B1   | . | NA   | NA    | NA       | NA   | synonymous SNV    | NM_001039500 | exon6  | c.T729C   | p.H243H  |
| Clonal           | chr16 | 30685336  | C | G | RNF40    | . | NA   | NA    | 0.469    | 0.1  | nonsynonymous SNV | NM_014771    | exon10 | c.C1249G  | p.L417V  |
| Clonal           | chr19 | 60133783  | G | T | NLRP7    | . | NA   | NA    | NA       | NA   | synonymous SNV    | NM_139176    | exon9  | c.C2622A  | p.A874A  |
| Clonal           | chr5  | 178071778 | C | G | ZNF354A  | . | NA   | NA    | 0.012    | 0    | nonsynonymous SNV | NM_005649    | exon5  | c.G1707C  | p.Q569H  |
| Clonal           | chr9  | 128495387 | G | A | LMX1B    | . | NA   | NA    | NA       | NA   | synonymous SNV    | NM_002316    | exon4  | c.G705A   | p.K235K  |
| Clonal           | chr11 | 6610301   | A | G | DCHS1    | . | NA   | NA    | NA       | NA   | synonymous SNV    | NM_003737    | exon6  | c.T3018C  | p.R1006R |
| Clonal           | chr1  | 151922589 | C | T | NPR1     | . | NA   | NA    | NA       | NA   | synonymous SNV    | NM_000906    | exon6  | c.C1377T  | p.N459N  |
| Clonal           | chr16 | 19396335  | T | C | TMCS     | . | NA   | NA    | NA       | NA   | synonymous SNV    | NM_024780    | exon9  | c.T1425C  | p.G475G  |
| Clonal           | chr14 | 75300805  | C | T | TLL5     | . | NA   | NA    | NA       | NA   | synonymous SNV    | NM_015072    | exon19 | c.C1645T  | p.L549L  |
| Clonal           | chr15 | 64397992  | G | A | DIS3L    | . | NA   | NA    | NA       | NA   | synonymous SNV    | NM_001143688 | exon8  | c.G1146A  | p.Q382Q  |
| Clonal           | chr11 | 74224338  | C | T | RNF169   | . | NA   | NA    | 1        | NA   | nonsynonymous SNV | NM_001098638 | exon6  | c.C1042T  | p.R348C  |
| Clonal           | chr19 | 7713933   | G | C | CD209    | . | NA   | NA    | 0.271898 | 0.24 | nonsynonymous SNV | NM_001144894 | exon5  | c.C1075G  | p.P359A  |
| Clonal           | chr1  | 151928920 | C | T | NPR1     | . | NA   | NA    | NA       | NA   | synonymous SNV    | NM_000906    | exon19 | c.C2772T  | p.G924G  |
| Clonal           | chr16 | 4431493   | C | T | DNAJA3   | . | NA   | NA    | NA       | NA   | synonymous SNV    | NM_001135110 | exon4  | c.C546T   | p.P182P  |
| Clonal           | chr16 | 30278031  | C | T | TBC1D10B | . | NA   | NA    | NA       | NA   | synonymous SNV    | NM_015527    | exon7  | c.G1605A  | p.A535A  |
| Clonal           | chr16 | 3433149   | C | T | ZNF597   | . | NA   | NA    | NA       | NA   | synonymous SNV    | NM_152457    | exon2  | c.G6A     | p.A2A    |
| Clonal           | chr1  | 78875334  | G | A | IFI44L   | . | NA   | NA    | NA       | NA   | synonymous SNV    | NM_006820    | exon6  | c.G906A   | p.E302E  |
| Clonal           | chr13 | 100510177 | T | C | NALCN    | . | NA   | NA    | NA       | NA   | synonymous SNV    | NM_052867    | exon42 | c.A4899G  | p.Q1633Q |
| Clonal           | chr4  | 1923647   | G | A | WHSC1    | . | NA   | WHSC1 | NA       | NA   | synonymous SNV    | NM_133331    | exon12 | c.G2028A  | p.P676P  |
| Clonal           | chr15 | 68912309  | C | T | LARP6    | . | NA   | NA    | NA       | NA   | synonymous SNV    | NM_018357    | exon3  | c.G612A   | p.Q204Q  |
| Clonal           | chr14 | 34304053  | G | A | BAZ1A    | . | NA   | NA    | NA       | NA   | synonymous SNV    | NM_013448    | exon22 | c.C3474T  | p.G1158G |
| Clonal           | chr1  | 155205752 | C | T | ARHGEF11 | . | NA   | NA    | NA       | NA   | synonymous SNV    | NM_198236    | exon10 | c.G771A   | p.Q257Q  |
| Clonal           | chr20 | 2794141   | G | A | VPS16    | . | NA   | NA    | NA       | NA   | synonymous SNV    | NM_080413    | exon18 | c.G1839A  | p.L613L  |
| Clonal           | chr6  | 31702873  | G | A | PRRC2A   | . | NA   | NA    | NA       | NA   | synonymous SNV    | NM_004638    | exon11 | c.G1209A  | p.P403P  |
| Clonal           | chr1  | 120267911 | C | T | NOTCH2   | . | NA   | NA    | NA       | NA   | synonymous SNV    | NM_024408    | exon26 | c.G4731A  | p.L1577L |
| Clonal           | chr6  | 111042482 | C | T | CDK19    | . | NA   | NA    | NA       | NA   | synonymous SNV    | NM_015076    | exon13 | c.G1458A  | p.S486S  |
| Clonal           | chr6  | 149436760 | G | A | UST      | . | NA   | NA    | 0.617    | 0.01 | nonsynonymous SNV | NM_005715    | exon8  | c.G1036A  | p.E346K  |
| Clonal           | chr6  | 36036768  | G | A | SLC26A8  | . | NA   | NA    | NA       | NA   | synonymous SNV    | NM_052961    | exon13 | c.C1548T  | p.I516I  |
| Clonal           | chr6  | 138686600 | G | A | KIAA1244 | . | NA   | NA    | NA       | NA   | synonymous SNV    | NM_020340    | exon30 | c.G4866A  | p.V1622V |
| Clonal           | chr6  | 43520541  | G | T | ABCC10   | . | NA   | NA    | 1        | 0    | nonsynonymous SNV | NM_001198934 | exon13 | c.G2727T  | p.W909C  |
| Clonal           | chr1  | 148794633 | G | T | ADAMTSL4 | . | NA   | NA    | 0        | 1    | nonsynonymous SNV | NM_019032    | exon8  | c.G1339T  | p.A447S  |
| Clonal           | chr11 | 66149270  | C | T | RBM14    | . | NA   | NA    | NA       | NA   | synonymous SNV    | NM_006328    | exon2  | c.C1347T  | p.Y449Y  |
| Clonal           | chr19 | 16527182  | C | T | SLC35E1  | . | NA   | NA    | NA       | NA   | synonymous SNV    | NM_024881    | exon5  | c.G783A   | p.T261T  |
| Clonal           | chr6  | 138244039 | G | A | TNFAIP3  | . | p.0? | NA    | 0.027    | 0.28 | nonsynonymous SNV | NM_006290    | exon9  | c.G2263A  | p.E755K  |
| Clonal           | chr14 | 61611826  | C | A | SYT16    | . | NA   | NA    | NA       | NA   | synonymous SNV    | NM_031914    | exon3  | c.C957A   | p.S319S  |
| Clonal           | chr19 | 13889899  | C | T | CC2D1A   | . | NA   | NA    | NA       | NA   | synonymous SNV    | NM_017721    | exon7  | c.C765T   | p.G255G  |
| Tumor Subclone 1 | chr19 | 9385043   | A | G | ZNF266   | . | NA   | NA    | 0.998    | 0    | nonsynonymous SNV | NM_006631    | exon11 | c.T1558C  | p.Y520H  |
| Tumor Subclone 1 | chr19 | 16180883  | G | A | AP1M1    | . | NA   | NA    | NA       | NA   | synonymous SNV    | NM_001130524 | exon5  | c.G441A   | p.P147P  |
| Tumor Subclone 1 | chr19 | 56964284  | T | C | FPR2     | . | NA   | NA    | NA       | NA   | synonymous SNV    | NM_0011462   | exon2  | c.T561C   | p.P187P  |
| Tumor Subclone 1 | chr19 | 59412890  | T | C | LILRB3   | . | NA   | NA    | 0.986    | 0    | nonsynonymous SNV | NM_006864    | exon13 | c.A1780G  | p.T594A  |
| Tumor Subclone 1 | chrX  | 27676337  | T | C | DCAF8L2  | . | NA   | NA    | NA       | NA   | synonymous SNV    | NM_001136533 | exon1  | c.T1404C  | p.N468N  |
| Tumor Subclone 1 | chr9  | 136857541 | A | G | COL5A1   | . | NA   | NA    | NA       | NA   | synonymous SNV    | NM_000093    | exon63 | c.A5037G  | p.T1679T |
| Tumor Subclone 1 | chr19 | 42881708  | A | C | ZNF607   | . | NA   | NA    | 0.404    | 0    | nonsynonymous SNV | NM_032689    | exon5  | c.T1164G  | p.S388R  |
| Tumor Subclone 1 | chr11 | 62046756  | T | G | AHNAK    | . | NA   | NA    | 0.001    | 0.02 | nonsynonymous SNV | NM_001620    | exon5  | c.A11709C | p.Q3903H |
| Tumor Subclone 1 | chr14 | 23711815  | A | G | REC8     | . | NA   | NA    | 0.825    | 0.08 | nonsynonymous SNV | NM_005132    | exon3  | c.A110G   | p.N37S   |
| Tumor Subclone 1 | chr8  | 110371310 | A | G | NUDCD1   | . | NA   | NA    | NA       | NA   | synonymous SNV    | NM_032869    | exon5  | c.T669C   | p.R223R  |
| Tumor Subclone 1 | chr11 | 62277035  | A | T | ZBTB3    | . | NA   | NA    | NA       | NA   | synonymous SNV    | NM_024784    | exon2  | c.T828A   | p.T276T  |
| Tumor Subclone 1 | chr6  | 26343033  | T | C | HIST1H1D | . | NA   | NA    | NA       | NA   | synonymous SNV    | NM_005320    | exon1  | c.A108G   | p.A36A   |
| Tumor Subclone 1 | chr11 | 67515634  | A | G | UNKNOWN  | . | NA   | NA    | NA       | 0    | unknown           |              |        |           |          |
| Tumor Subclone 1 | chr12 | 78713621  | A | G | PPP1R12A | . | NA   | NA    | NA       | NA   | synonymous SNV    | NM_001143886 | exon18 | c.T2250C  | p.P750P  |

|                  |       |           |   |   |           |   |    |    |          |      |                   |              |        |          |          |
|------------------|-------|-----------|---|---|-----------|---|----|----|----------|------|-------------------|--------------|--------|----------|----------|
| Tumor Subclone 1 | chr19 | 22155111  | A | G | ZNF676    | . | NA | NA | NA       | NA   | synonymous SNV    | NM_001001411 | exon3  | c.T1248C | p.T416T  |
| Tumor Subclone 1 | chr7  | 20410807  | A | G | ITGB8     | . | NA | NA | NA       | NA   | synonymous SNV    | NM_002214    | exon11 | c.A1719G | p.Q573Q  |
| Tumor Subclone 1 | chr5  | 150703334 | G | A | SLC36A2   | . | NA | NA | NA       | NA   | synonymous SNV    | NM_181776    | exon3  | c.C274T  | p.L92L   |
| Tumor Subclone 1 | chr2  | 99354567  | T | G | EIF5B     | . | NA | NA | NA       | NA   | synonymous SNV    | NM_015904    | exon9  | c.T1494G | p.T498T  |
| Tumor Subclone 1 | chr20 | 18091384  | G | A | CSRP2BP   | . | NA | NA | 0.997    | 0.01 | nonsynonymous SNV | NM_020536    | exon6  | c.G1466A | p.R489Q  |
| Tumor Subclone 1 | chr19 | 39524671  | C | A | KIAA0355  | . | NA | NA | NA       | NA   | synonymous SNV    | NM_014686    | exon10 | c.C1992A | p.G664G  |
| Tumor Subclone 1 | chr8  | 88955052  | T | C | DCAF4L2   | . | NA | NA | NA       | NA   | synonymous SNV    | NM_152418    | exon1  | c.A264G  | p.T88T   |
| Tumor Subclone 1 | chr1  | 205934663 | A | G | CR1L      | . | NA | NA | NA       | 0.82 | nonsynonymous SNV | NM_175710    | exon5  | c.A806G  | p.H269R  |
| Tumor Subclone 1 | chr7  | 2284378   | C | T | SNX8      | . | NA | NA | NA       | NA   | synonymous SNV    | NM_013321    | exon2  | c.G183A  | p.P61P   |
| Tumor Subclone 1 | chr20 | 36789658  | G | A | SLC32A1   | . | NA | NA | NA       | NA   | synonymous SNV    | NM_080552    | exon2  | c.G540A  | p.V180V  |
| Tumor Subclone 1 | chr1  | 149203452 | A | G | SETDB1    | . | NA | NA | NA       | NA   | synonymous SNV    | NM_001145415 | exon22 | c.A3864G | p.G1288G |
| Tumor Subclone 1 | chr19 | 9223072   | A | C | OR7E24    | . | NA | NA | NA       | 0    | nonsynonymous SNV | NM_001079935 | exon1  | c.A353C  | p.Q118P  |
| Tumor Subclone 1 | chrX  | 9581713   | A | G | TBL1X     | . | NA | NA | NA       | NA   | synonymous SNV    | NM_001139466 | exon4  | c.A87G   | p.Q29Q   |
| Tumor Subclone 1 | chr1  | 151000008 | A | G | KPRP      | . | NA | NA | NA       | NA   | synonymous SNV    | NM_001025231 | exon2  | c.A1320G | p.L440L  |
| Tumor Subclone 1 | chr2  | 241097450 | A | G | ANKMY1    | . | NA | NA | NA       | NA   | synonymous SNV    | NM_016552    | exon11 | c.T2115C | p.S705S  |
| Tumor Subclone 1 | chr6  | 152374609 | T | C | ESR1      | . | NA | NA | NA       | NA   | synonymous SNV    | NM_001122740 | exon6  | c.T1222C | p.L408L  |
| Tumor Subclone 1 | chr17 | 16038550  | T | G | NCOR1     | . | NA | NA | 0.999    | 0.08 | nonsynonymous SNV | NM_001190440 | exon1  | c.A59C   | p.Y20S   |
| Tumor Subclone 1 | chr14 | 80372417  | T | C | CEP128    | . | NA | NA | NA       | NA   | synonymous SNV    | NM_152446    | exon11 | c.A942G  | p.T314T  |
| Tumor Subclone 1 | chr19 | 60403609  | G | A | PTPRH     | . | NA | NA | NA       | NA   | synonymous SNV    | NM_002842    | exon7  | c.C1227T | p.P409P  |
| Tumor Subclone 1 | chr5  | 76006183  | A | G | IQGAP2    | . | NA | NA | NA       | NA   | synonymous SNV    | NM_006633    | exon27 | c.A3420G | p.S1140S |
| Tumor Subclone 1 | chr7  | 103564472 | A | C | ORC5      | . | NA | NA | NA       | NA   | synonymous SNV    | NM_002553    | exon13 | c.T1254G | p.A418A  |
| Tumor Subclone 1 | chr9  | 137913423 | G | T | CAMSAP1   | . | NA | NA | NA       | NA   | synonymous SNV    | NM_015447    | exon3  | c.C462A  | p.A154A  |
| Tumor Subclone 2 | chr19 | 10063188  | C | T | C19orf66  | . | NA | NA | NA       | NA   | synonymous SNV    | NM_018381    | exon7  | c.C525T  | p.Y175Y  |
| Tumor Subclone 2 | chr4  | 5675245   | C | T | EVC2      | . | NA | NA | NA       | NA   | synonymous SNV    | NM_001166136 | exon14 | c.G2181A | p.R727R  |
| Tumor Subclone 2 | chr19 | 19101983  | C | T | TMEM161A  | . | NA | NA | 0.998    | 0.01 | nonsynonymous SNV | NM_017814    | exon6  | c.G577A  | p.E193K  |
| Tumor Subclone 2 | chr3  | 46698570  | C | T | ALS2CL    | . | NA | NA | NA       | NA   | synonymous SNV    | NM_001190707 | exon11 | c.G1128A | p.P376P  |
| Tumor Subclone 2 | chr1  | 234036347 | C | A | LYST      | . | NA | NA | NA       | NA   | synonymous SNV    | NM_000081    | exon6  | c.G2712T | p.V904V  |
| Tumor Subclone 2 | chr1  | 181122892 | C | T | DHX9      | . | NA | NA | NA       | NA   | synonymous SNV    | NM_001357    | exon28 | c.C3513T | p.S1171S |
| Tumor Subclone 2 | chr1  | 38038016  | C | A | MANEAL    | . | NA | NA | 0.997    | 0.03 | nonsynonymous SNV | NM_152496    | exon2  | c.C262A  | p.H88N   |
| Tumor Subclone 2 | chr19 | 10126351  | G | A | DNMT1     | . | NA | NA | NA       | NA   | synonymous SNV    | NM_001130823 | exon21 | c.C1743T | p.D581D  |
| Tumor Subclone 2 | chr1  | 202088131 | C | G | ZC3H11A   | . | NA | NA | 0.646733 | 0.03 | stopgain SNV      | NM_014827    | exon20 | c.C2414G | p.S805X  |
| Tumor Subclone 2 | chr5  | 39170767  | C | T | FYB       | . | NA | NA | NA       | NA   | nonsynonymous SNV | NM_199335    | exon8  | c.G1622A | p.R541H  |
| Tumor Subclone 2 | chr1  | 179969344 | G | A | CACNA1E   | . | NA | NA | NA       | 0.38 | nonsynonymous SNV | NM_001205293 | exon21 | c.G3097A | p.A1033T |
| Tumor Subclone 2 | chr12 | 116777719 | C | T | KSR2      | . | NA | NA | NA       | NA   | synonymous SNV    | NM_173598    | exon3  | c.G282A  | p.T94T   |
| Tumor Subclone 2 | chr16 | 68284688  | G | A | NFAT5     | . | NA | NA | NA       | NA   | synonymous SNV    | NM_173215    | exon13 | c.G3177A | p.Q1059Q |
| Tumor Subclone 2 | chr19 | 47519622  | G | A | TMEM145   | . | NA | NA | NA       | NA   | synonymous SNV    | NM_173633    | exon14 | c.G1242A | p.V414V  |
| Tumor Subclone 2 | chr12 | 54502636  | C | T | DNAJC14   | . | NA | NA | NA       | NA   | synonymous SNV    | NM_032364    | exon5  | c.G1782A | p.V594V  |
| Tumor Subclone 2 | chr2  | 74543550  | C | G | MOGS      | . | NA | NA | 0.799    | 0.05 | nonsynonymous SNV | NM_001146158 | exon5  | c.G556C  | p.A186P  |
| Tumor Subclone 2 | chr14 | 28307391  | C | T | FOXG1     | . | NA | NA | NA       | NA   | synonymous SNV    | NM_005249    | exon11 | c.C1155T | p.A385A  |
| Tumor Subclone 2 | chr21 | 44818101  | G | A | KRTAP10-4 | . | NA | NA | 0.401049 | NA   | nonsynonymous SNV | NM_198687    | exon1  | c.G38A   | p.R13H   |
| Tumor Subclone 2 | chr14 | 23953810  | A | G | NYNRIN    | . | NA | NA | NA       | NA   | synonymous SNV    | NM_025081    | exon9  | c.A3015G | p.R1005R |
| Tumor Subclone 2 | chr6  | 24958912  | G | A | FAM65B    | . | NA | NA | NA       | NA   | synonymous SNV    | NM_015864    | exon10 | c.C690T  | p.G230G  |
| Tumor Subclone 2 | chr17 | 45152189  | G | A | FAM117A   | . | NA | NA | NA       | NA   | synonymous SNV    | NM_030802    | exon5  | c.C640T  | p.L214L  |
| Tumor Subclone 3 | chr8  | 67251997  | G | A | CRH       | . | NA | NA | NA       | NA   | synonymous SNV    | NM_000756    | exon2  | c.C270T  | p.A90A   |
| Tumor Subclone 3 | chr2  | 191721139 | G | A | STAT4     | . | NA | NA | NA       | NA   | synonymous SNV    | NM_003151    | exon2  | c.C36T   | p.I12I   |
| Tumor Subclone 3 | chrX  | 118487757 | G | A | SLC25A5   | . | NA | NA | 0.1      | 0    | nonsynonymous SNV | NM_001152    | exon2  | c.G217A  | p.G73S   |
| Tumor Subclone 3 | chr1  | 243596900 | C | T | KIF26B    | . | NA | NA | NA       | NA   | synonymous SNV    | NM_018012    | exon3  | c.C607T  | p.L203L  |
| Tumor Subclone 3 | chr19 | 8703036   | A | T | ORZ21     | . | NA | NA | 0.157    | 0.44 | nonsynonymous SNV | NM_001004699 | exon1  | c.A646T  | p.T216S  |
| Tumor Subclone 3 | chr18 | 28511245  | T | C | KLHL14    | . | NA | NA | NA       | NA   | synonymous SNV    | NM_020805    | exon8  | c.A1635G | p.K545K  |
| Tumor Subclone 3 | chr9  | 131670394 | T | C | USP20     | . | NA | NA | 0.51     | 0.38 | nonsynonymous SNV | NM_001008563 | exon11 | c.T980C  | p.M327T  |
| Tumor Subclone 3 | chr2  | 176744810 | G | A | HOXD3     | . | NA | NA | NA       | NA   | synonymous SNV    | NM_006898    | exon3  | c.G861A  | p.P287P  |
| Tumor Subclone 3 | chr19 | 6446473   | G | A | TUBB4A    | . | NA | NA | 0.998    | 0    | nonsynonymous SNV | NM_006087    | exon4  | c.C1037T | p.P346L  |
| Tumor Subclone 3 | chrX  | 46318834  | G | A | CHST7     | . | NA | NA | 0.995    | 0    | nonsynonymous SNV | NM_019886    | exon1  | c.G524A  | p.G175E  |
| Tumor Subclone 3 | chr8  | 48802367  | C | T | KIAA0146  | . | NA | NA | NA       | NA   | synonymous SNV    | NM_001080394 | exon17 | c.C2394T | p.D798D  |
| Tumor Subclone 3 | chr5  | 159276967 | G | A | ADRA1B    | . | NA | NA | NA       | NA   | synonymous SNV    | NM_000679    | exon1  | c.G477A  | p.R159R  |



Supplementary Table ST5.2 New Mutations Detected in Bladder Cancer

| Classification          | Chromosome   | Coordinate      | Ref      | Var      | Gene Name    | dbSNP ID | Cosmic         | CancerGene   | POLY         | SIFT        | Types                    | Gene ID          | Exon         | Nucleotide      | Amino Acid     |
|-------------------------|--------------|-----------------|----------|----------|--------------|----------|----------------|--------------|--------------|-------------|--------------------------|------------------|--------------|-----------------|----------------|
| Clonal                  | chr1         | 109279013       | G        | A        | CLCC1        | .        | NA             | NA           | NA           | NA          | synonymous SNV           | NM_015127        | exon11       | c.C1308T        | p.S436S        |
| Clonal                  | chr9         | 39168337        | C        | G        | CNTNAP3      | .        | NA             | NA           | 0.992        | 0           | nonsynonymous SNV        | NM_033655        | exon5        | c.G559C         | p.D187H        |
| Clonal                  | chr4         | 2611320         | G        | C        | FAM193A      | .        | NA             | NA           | 0.015        | 0.03        | nonsynonymous SNV        | NM_003704        | exon4        | c.G226C         | p.E76Q         |
| Clonal                  | chr4         | 1773366         | C        | G        | FGFR3        | .        | p.R248_S249del | FGFR3        | 0.522        | 0.01        | nonsynonymous SNV        | NM_022965        | exon7        | c.C746G         | p.S249C        |
| Clonal                  | chr5         | 156412146       | C        | T        | HAVCR1       | .        | NA             | NA           | NA           | NA          | synonymous SNV           | NM_001099414     | exon4        | c.G477A         | p.T159T        |
| Clonal                  | chr14        | 59020707        | C        | A        | L3HYPDH      | .        | NA             | NA           | NA           | NA          | synonymous SNV           | NM_144581        | exon1        | c.G81T          | p.T27T         |
| Clonal                  | chr8         | 105670255       | G        | A        | LRP12        | .        | NA             | NA           | 0.01         | 0.07        | nonsynonymous SNV        | NM_013437        | exon1        | c.C47T          | p.A16V         |
| Clonal                  | chr3         | 120933910       | T        | A        | MAATS1       | .        | NA             | NA           | 0.427        | 0.08        | nonsynonymous SNV        | NM_033364        | exon9        | c.T1098A        | p.D366E        |
| Clonal                  | chr8         | 134325811       | G        | T        | NDRG1        | .        | NA             | NA           | 0.196        | 0           | nonsynonymous SNV        | NM_001258432     | exon12       | c.G662A         | p.A221E        |
| Clonal                  | chr8         | 144991915       | C        | A        | NRBP2        | .        | NA             | NA           | 0.734689     | NA          | stopgain SNV             | NM_178564        | exon11       | c.G841T         | p.E281X        |
| Clonal                  | chr17        | 70720800        | C        | T        | NUP85        | .        | NA             | NA           | NA           | NA          | synonymous SNV           | NM_024844        | exon5        | c.C396T         | p.F132F        |
| Clonal                  | chrX         | 55119822        | A        | C        | PAGE2B       | .        | NA             | NA           | NA           | NA          | synonymous SNV           | NM_001015038     | exon3        | c.A180C         | p.A60A         |
| Clonal                  | chr2         | 112864063       | G        | A        | RGPD8        | .        | NA             | NA           | NA           | NA          | nonsynonymous SNV        | NM_001164463     | exon20       | c.C2930T        | p.S977L        |
| Clonal                  | chr19        | 4495381         | G        | A        | SEMA6B       | .        | NA             | NA           | NA           | NA          | synonymous SNV           | NM_032108        | exon17       | c.C1899T        | p.R633R        |
| Clonal                  | chr17        | 30704820        | C        | A        | SLFN11       | .        | NA             | NA           | 0.556597     | 0.09        | stopgain SNV             | NM_001104588     | exon6        | c.G1570T        | p.E524X        |
| Clonal                  | chr10        | 72206982        | T        | C        | TBATA        | .        | NA             | NA           | 0.002        | 0.3         | nonsynonymous SNV        | NM_152710        | exon7        | c.A623G         | p.Q208R        |
| Clonal                  | chrX         | 70386653        | G        | C        | ZMYM3        | .        | NA             | NA           | 0.588        | 0.02        | nonsynonymous SNV        | NM_001171163     | exon6        | c.C1199G        | p.S400C        |
| Clonal                  | chr19        | 21285269        | C        | T        | ZNF708       | .        | NA             | NA           | 0.958        | 0.06        | nonsynonymous SNV        | NM_021269        | exon2        | c.G4A           | p.G2R          |
| Tumor Subclone 1        | chr1         | 225219372       | G        | A        | ADCK3        | .        | NA             | NA           | 0.011        | 0.03        | nonsynonymous SNV        | NM_020247        | exon3        | c.G226A         | p.E76K         |
| Tumor Subclone 1        | chr6         | 38891314        | G        | C        | DNAH8        | .        | NA             | NA           | NA           | NA          | synonymous SNV           | NM_001206927     | exon26       | c.G3426C        | p.G1142G       |
| Tumor Subclone 1        | chrX         | 65331711        | C        | T        | HEPH         | .        | NA             | NA           | NA           | NA          | synonymous SNV           | NM_138737        | exon9        | c.C1578T        | p.F526F        |
| Tumor Subclone 1        | chr6         | 31430894        | G        | C        | HLA-B        | .        | NA             | NA           | NA           | NA          | synonymous SNV           | NM_005514        | exon5        | c.C981G         | p.V327V        |
| Tumor Subclone 1        | chr16        | 22453366        | G        | C        | LOC100132247 | .        | NA             | NA           | NA           | NA          | nonsynonymous SNV        | NM_001135865     | exon7        | c.G1561C        | p.A521P        |
| Tumor Subclone 1        | chr11        | 47600865        | C        | A        | MTCH2        | .        | NA             | NA           | NA           | NA          | synonymous SNV           | NM_014342        | exon12       | c.G789T         | p.T263T        |
| Tumor Subclone 1        | chr5         | 180099203       | C        | G        | OR2Y1        | .        | NA             | NA           | NA           | NA          | synonymous SNV           | NM_001001657     | exon1        | c.G462C         | p.V154V        |
| Tumor Subclone 1        | chrX         | 99549746        | G        | A        | PCDH19       | .        | NA             | NA           | 0.768        | 0           | nonsynonymous SNV        | NM_001105243     | exon1        | c.C506T         | p.T169M        |
| Tumor Subclone 1        | chr5         | 55004159        | C        | G        | SLC38A9      | .        | NA             | NA           | 0.841        | 0.08        | nonsynonymous SNV        | NM_173514        | exon4        | c.G235C         | p.D79H         |
| Tumor Subclone 1        | chr6         | 159098329       | C        | G        | SYTL3        | .        | NA             | NA           | 0.006        | 0.04        | nonsynonymous SNV        | NM_001242395     | exon12       | c.C1032G        | p.I344M        |
| Tumor Subclone 1        | chr12        | 11065759        | C        | G        | TAS2R19      | .        | NA             | NA           | 0.616        | NA          | nonsynonymous SNV        | NM_176888        | exon1        | c.G679C         | p.A227P        |
| Tumor Subclone 2        | chr4         | 14643885        | C        | T        | CPEB2        | .        | NA             | NA           | 0.735404     | 0           | stopgain SNV             | NM_182485        | exon5        | c.C2128T        | p.R710X        |
| Tumor Subclone 2        | chr8         | 7205184         | G        | A        | ZNF705G      | .        | NA             | NA           | NA           | NA          | stopgain SNV             | NM_001164457     | exon3        | c.C220T         | p.Q74X         |
| Tumor Subclone 2        | chr16        | 30501393        | C        | G        | ZNF785       | .        | NA             | NA           | 0.903        | 0           | nonsynonymous SNV        | NM_152458        | exon3        | c.G1207C        | p.E403Q        |
| Tumor Subclone 3        | chr7         | 72789510        | C        | T        | ABHD11       | .        | NA             | NA           | 0.011        | 0.55        | nonsynonymous SNV        | NM_148912        | exon4        | c.G610A         | p.E204K        |
| Tumor Subclone 3        | chr9         | 115171866       | G        | A        | BSPRY        | .        | NA             | NA           | 0            | 0.56        | nonsynonymous SNV        | NM_017688        | exon6        | c.G832A         | p.A278T        |
| Tumor Subclone 3        | chr6         | 154777212       | C        | T        | CNKSR3       | .        | NA             | NA           | 0.063        | 0.46        | nonsynonymous SNV        | NM_173515        | exon10       | c.G983A         | p.S328N        |
| Tumor Subclone 3        | chr17        | 23878491        | G        | A        | FOXN1        | .        | NA             | NA           | NA           | NA          | synonymous SNV           | NM_003593        | exon3        | c.G684A         | p.Q228Q        |
| <b>Tumor Subclone 3</b> | <b>chr16</b> | <b>23553821</b> | <b>C</b> | <b>G</b> | <b>PALB2</b> | .        | <b>NA</b>      | <b>PALB2</b> | <b>0.998</b> | <b>0.07</b> | <b>nonsynonymous SNV</b> | <b>NM_024675</b> | <b>exon4</b> | <b>c.G1547C</b> | <b>p.R516T</b> |
| Tumor Subclone 3        | chr15        | 32183389        | C        | T        | PGBD4        | .        | NA             | NA           | NA           | NA          | synonymous SNV           | NM_152595        | exon1        | c.C1365T        | p.F455F        |
| Tumor Subclone 3        | chr1         | 89221226        | G        | A        | RBMXL1       | .        | NA             | NA           | 0.012        | 0.44        | nonsynonymous SNV        | NM_019610        | exon2        | c.C872T         | p.S291L        |
| Tumor Subclone 3        | chr17        | 71136789        | C        | T        | RECQL5       | .        | NA             | NA           | 0            | 1           | nonsynonymous SNV        | NM_004259        | exon16       | c.G2309A        | p.R770Q        |
| Tumor Subclone 3        | chr2         | 231047372       | C        | T        | SP100        | .        | NA             | NA           | NA           | NA          | synonymous SNV           | NM_001080391     | exon17       | c.C1566T        | p.N522N        |
| Tumor Subclone 3        | chr2         | 179321628       | G        | C        | TTN          | .        | NA             | NA           | 0.413091     | NA          | nonsynonymous SNV        | NM_133379        | exon46       | c.C13744G       | p.Q4582E       |

Supplementary Table ST5.3 New Mutations Detected in ALL

| Classification    | Chromosome | Coordinate | Ref | Var | Gene Name | dbSNP ID | Cosmic | CancerGene | POLY     | SIFT | Types             | Gene ID      | Exon   | Nucleotide | Amino Acid |
|-------------------|------------|------------|-----|-----|-----------|----------|--------|------------|----------|------|-------------------|--------------|--------|------------|------------|
| Clonal            | chr9       | 131856117  | T   | G   | GPR107    | .        | NA     | NA         | 0.036    | 0.03 | nonsynonymous SNV | NM_001136558 | exon1  | c.T85G     | p.L29V     |
| Clonal            | chr9       | 21176964   | A   | T   | IFNA4     | .        | NA     | NA         | 0        | 0.52 | nonsynonymous SNV | NM_021068    | exon1  | c.T567A    | p.D189E    |
| Clonal            | chr11      | 48303970   | G   | T   | OR4C3     | .        | NA     | NA         | 0.532064 | 0.01 | nonsynonymous SNV | NM_001004702 | exon1  | c.G902T    | p.G301V    |
| Multiple          | chr9       | 135285026  | T   | C   | ADAMTS13  | .        | NA     | NA         | 0.999    | 0.01 | nonsynonymous SNV | NM_139025    | exon8  | c.T971C    | p.F324S    |
| Multiple          | chr7       | 56141556   | C   | T   | CHCHD2    | .        | NA     | NA         | NA       | NA   | synonymous SNV    | NM_016139    | exon1  | c.G45A     | p.P15P     |
| Multiple          | chrX       | 32473355   | G   | A   | DMD       | .        | NA     | NA         | NA       | NA   | synonymous SNV    | NM_004009    | exon17 | c.C1998T   | p.T666T    |
| Multiple          | chr17      | 40674598   | C   | T   | FMN11     | .        | NA     | NA         | 0.143    | 0.7  | nonsynonymous SNV | NM_005892    | exon14 | c.C1399T   | p.P467S    |
| Multiple          | chr19      | 12744712   | A   | G   | HOOK2     | .        | NA     | NA         | NA       | NA   | synonymous SNV    | NM_013312    | exon5  | c.T270C    | p.P90P     |
| Multiple          | chr19      | 10262915   | G   | A   | ICAM5     | .        | NA     | NA         | 0.008    | 0.35 | nonsynonymous SNV | NM_003259    | exon2  | c.G250A    | p.A84T     |
| Multiple          | chr9       | 21156062   | T   | C   | IFNA21    | .        | NA     | NA         | 0.018    | 0.05 | nonsynonymous SNV | NM_002175    | exon1  | c.A550G    | p.R184G    |
| Multiple          | chrX       | 51655233   | G   | A   | MAGED1    | .        | NA     | NA         | NA       | NA   | synonymous SNV    | NM_001005332 | exon3  | c.G390A    | p.Q130Q    |
| Multiple          | chr10      | 129792276  | T   | C   | MKI67     | .        | NA     | NA         | NA       | NA   | synonymous SNV    | NM_001145966 | exon12 | c.A6738G   | p.T2246T   |
| Multiple          | chr10      | 102044809  | C   | T   | PKD2L1    | .        | NA     | NA         | 1        | 0    | nonsynonymous SNV | NM_001253837 | exon8  | c.G1277A   | p.C426Y    |
| Multiple          | chr9       | 33788041   | T   | C   | PRSS3     | .        | NA     | NA         | 1        | 0    | nonsynonymous SNV | NM_001197098 | exon3  | c.T394C    | p.C132R    |
| Multiple          | chr9       | 33788046   | C   | T   | PRSS3     | .        | NA     | NA         | NA       | NA   | synonymous SNV    | NM_001197098 | exon3  | c.C399T    | p.L133L    |
| Multiple          | chr12      | 112315280  | C   | G   | SDS       | .        | NA     | NA         | 0.916    | 0.33 | nonsynonymous SNV | NM_006843    | exon8  | c.G836C    | p.S279T    |
| Multiple          | chrX       | 46357671   | G   | A   | SLC9A7    | .        | NA     | NA         | NA       | NA   | synonymous SNV    | NM_001257291 | exon16 | c.C1926T   | p.Y642Y    |
| Multiple          | chr15      | 81289050   | G   | A   | WHAMM     | .        | NA     | NA         | NA       | 0.09 | nonsynonymous SNV | NM_001080435 | exon6  | c.G1415A   | p.R472Q    |
| Multiple          | chr19      | 42852573   | C   | T   | ZNF781    | .        | NA     | NA         | 0.912    | 0.85 | nonsynonymous SNV | NM_152605    | exon4  | c.G317A    | p.R106Q    |
| Multiple          | chr19      | 42852557   | A   | G   | ZNF781    | .        | NA     | NA         | NA       | NA   | synonymous SNV    | NM_152605    | exon4  | c.T333C    | p.H111H    |
| Subclone 1        | chr3       | 182158387  | G   | C   | FXR1      | .        | NA     | NA         | 0.074    | 0.11 | nonsynonymous SNV | NM_001013439 | exon11 | c.G712C    | p.E238Q    |
| Subclone 1        | chr19      | 12744719   | G   | A   | HOOK2     | .        | NA     | NA         | 0.001    | 0.11 | nonsynonymous SNV | NM_013312    | exon5  | c.C263T    | p.A88V     |
| Subclone 1        | chr11      | 1204857    | G   | A   | MUC5B     | .        | NA     | NA         | NA       | NA   | nonsynonymous SNV | NM_002458    | exon5  | c.G482A    | p.R161H    |
| Subclone 1        | chr4       | 159787427  | G   | A   | RXFP1     | .        | NA     | NA         | NA       | NA   | synonymous SNV    | NM_001253732 | exon17 | c.G984A    | p.V328V    |
| Subclone 2        | chr4       | 48582288   | C   | G   | OC1AD2    | .        | NA     | NA         | 0.08     | 0.47 | nonsynonymous SNV | NM_001014446 | exon7  | c.G435C    | p.E145D    |
| Subclone 4        | chr2       | 51108670   | A   | G   | NRXN1     | .        | NA     | NA         | NA       | NA   | synonymous SNV    | NM_004801    | exon2  | c.T246C    | p.I82I     |
| Subclone 4,5      | chr9       | 115398966  | T   | C   | RGSS3     | .        | NA     | NA         | 0.851    | 0    | nonsynonymous SNV | NM_130795    | exon16 | c.T2666C   | p.L889P    |
| Subclones 2, 4, 5 | chr10      | 61616665   | C   | T   | ANK3      | .        | NA     | NA         | NA       | NA   | synonymous SNV    | NM_001204403 | exon18 | c.G1881A   | p.T627T    |

Supplementary Table 6: Prior probabilities for  $p_{\beta}^{g^{[1]},g^{[2]}}$ .

| $g^{[1]}g^{[2]}$ | $p_A^{g^{[1]},g^{[2]}}$ | $p_C^{g^{[1]},g^{[2]}}$ | $p_G^{g^{[1]},g^{[2]}}$ | $p_T^{g^{[1]},g^{[2]}}$ |
|------------------|-------------------------|-------------------------|-------------------------|-------------------------|
| AA               | $1-3p_e$                | $p_e$                   | $p_e$                   | $p_e$                   |
| CC               | $p_e$                   | $1-3p_e$                | $p_e$                   | $p_e$                   |
| GG               | $p_e$                   | $p_e$                   | $1-3p_e$                | $p_e$                   |
| TT               | $p_e$                   | $p_e$                   | $p_e$                   | $1-3p_e$                |
| AC               | $\frac{1-2p_e}{2}$      | $\frac{1-2p_e}{2}$      | $p_e$                   | $p_e$                   |
| AG               | $\frac{1-2p_e}{2}$      | $p_e$                   | $\frac{1-2p_e}{2}$      | $p_e$                   |
| AT               | $\frac{1-2p_e}{2}$      | $p_e$                   | $p_e$                   | $\frac{1-2p_e}{2}$      |
| CG               | $p_e$                   | $\frac{1-2p_e}{2}$      | $\frac{1-2p_e}{2}$      | $p_e$                   |
| CT               | $p_e$                   | $\frac{1-2p_e}{2}$      | $p_e$                   | $\frac{1-2p_e}{2}$      |
| GT               | $p_e$                   | $p_e$                   | $\frac{1-2p_e}{2}$      | $\frac{1-2p_e}{2}$      |
